# Supplementary material for: Molecular tools for studying the major malaria vector Anopheles funestus: improving the utility of the genome using a comparative poly(A) and Ribo-Zero RNAseq analysis
Source: BMC Genomics. 2015 Nov 14;16:931. doi: 10.1186/s12864-015-2114-z (PMC4647341; doi:10.1186/s12864-015-2114-z)
Supplement: Additional file 3: — Validation of annotated exon-exon junctions. Table of exon-exon junctions annotated in gene set Afun1.2 and the mitochondrial genome that were, or were not, validated by RNAseq data generated in this study. Introns validated at both ends (labelled 5′_and_3′) or at only one end (labelled 5′_only or 3′_only) are indicated. (XLSX 1949 kb) [file 12864_2015_2114_MOESM3_ESM.xlsx]

## Sheet: Table
Scaffold	Leftmost_position	Rightmost_position	Strand	Transcript	Intron_number	Intron_confirmed_by_RNAseq
KB668221	5241	6341	Rev	AFUN014182-RA	1_of_1
KB668221	8274	8356	Rev	AFUN001450-RA	3_of_3	5'_and_3'
KB668221	8466	8546	Rev	AFUN001450-RA	2_of_3	5'_and_3'
KB668221	8726	8949	Rev	AFUN001450-RA	1_of_3	5'_and_3'
KB668221	9981	10045	Fwd	AFUN001451-RA	1_of_2	5'_and_3'
KB668221	10986	12456	Fwd	AFUN001451-RA	2_of_2
KB668221	17779	17809	Fwd	AFUN014183-RA	1_of_1
KB668221	18795	19346	Rev	AFUN001452-RA	4_of_4	5'_and_3'
KB668221	19647	24405	Rev	AFUN001452-RA	3_of_4	5'_and_3'
KB668221	24597	24672	Rev	AFUN001452-RA	2_of_4	5'_and_3'
KB668221	27712	29357	Rev	AFUN001452-RA	1_of_4	3'_only
KB668221	68540	69439	Rev	AFUN001453-RA	2_of_2	5'_and_3'
KB668221	69753	71117	Rev	AFUN001453-RA	1_of_2
KB668221	126334	127401	Rev	AFUN001455-RA	1_of_1
KB668221	130966	131044	Rev	AFUN001456-RA	9_of_9	5'_and_3'
KB668221	131486	131648	Rev	AFUN001456-RA	8_of_9	5'_and_3'
KB668221	131756	131828	Rev	AFUN001456-RA	7_of_9	5'_and_3'
KB668221	131982	135018	Rev	AFUN001456-RA	6_of_9	5'_and_3'
KB668221	135295	135370	Rev	AFUN001456-RA	5_of_9	5'_and_3'
KB668221	135455	136156	Rev	AFUN001456-RA	4_of_9	5'_and_3'
KB668221	136322	136388	Rev	AFUN001456-RA	3_of_9	5'_and_3'
KB668221	136682	136755	Rev	AFUN001456-RA	2_of_9	5'_and_3'
KB668221	137322	138296	Rev	AFUN001456-RA	1_of_9
KB668221	138712	144146	Rev	AFUN001457-RA	1_of_1	5'_only
KB668221	145355	146916	Rev	AFUN014184-RA	1_of_1
KB668221	152034	152143	Rev	AFUN001458-RA	4_of_4	5'_and_3'
KB668221	152358	152424	Rev	AFUN001458-RA	3_of_4	5'_and_3'
KB668221	153469	153718	Rev	AFUN001458-RA	2_of_4	5'_and_3'
KB668221	153800	154381	Rev	AFUN001458-RA	1_of_4	3'_only
KB668221	181183	181258	Fwd	AFUN001459-RA	1_of_1
KB668221	182985	183528	Fwd	AFUN001460-RA	1_of_2	5'_and_3'
KB668221	183986	184055	Fwd	AFUN001460-RA	2_of_2	5'_and_3'
KB668221	189069	189136	Rev	AFUN001461-RA	4_of_4	5'_and_3'
KB668221	189295	189369	Rev	AFUN001461-RA	3_of_4	5'_and_3'
KB668221	189847	189936	Rev	AFUN001461-RA	2_of_4	5'_and_3'
KB668221	190101	190167	Rev	AFUN001461-RA	1_of_4	5'_and_3'
KB668221	191377	191482	Fwd	AFUN001462-RA	1_of_1	5'_and_3'
KB668221	195191	195781	Fwd	AFUN001463-RA	1_of_1	5'_and_3'
KB668221	197299	199716	Rev	AFUN001464-RA	2_of_2
KB668221	199812	200325	Rev	AFUN001464-RA	1_of_2
KB668221	200911	200984	Rev	AFUN001466-RA	2_of_2	5'_and_3'
KB668221	201132	201194	Rev	AFUN001466-RA	1_of_2	5'_and_3'
KB668221	201936	202303	Fwd	AFUN001467-RA	1_of_2	5'_and_3'
KB668221	202850	202925	Fwd	AFUN001467-RA	2_of_2	5'_and_3'
KB668221	207064	207399	Rev	AFUN001468-RA	3_of_3	5'_and_3'
KB668221	207699	208835	Rev	AFUN001468-RA	2_of_3	5'_and_3'
KB668221	208876	209216	Rev	AFUN001468-RA	1_of_3	5'_and_3'
KB668221	213621	213702	Rev	AFUN001469-RA	1_of_1
KB668221	215225	215324	Fwd	AFUN001470-RA	1_of_3	5'_and_3'
KB668221	216161	216243	Fwd	AFUN001470-RA	2_of_3	5'_and_3'
KB668221	216511	216571	Fwd	AFUN001470-RA	3_of_3	5'_and_3'
KB668221	216885	216972	Rev	AFUN001471-RA	3_of_3	5'_and_3'
KB668221	217143	217217	Rev	AFUN001471-RA	2_of_3	5'_and_3'
KB668221	217938	218000	Rev	AFUN001471-RA	1_of_3	5'_and_3'
KB668221	236071	236074	Fwd	AFUN001472-RA	1_of_3	3'_only
KB668221	237143	237238	Fwd	AFUN001472-RA	2_of_3	5'_and_3'
KB668221	237412	237768	Fwd	AFUN001472-RA	3_of_3
KB668221	245432	245502	Rev	AFUN001473-RA	5_of_5	5'_and_3'
KB668221	246482	246583	Rev	AFUN001473-RA	4_of_5	5'_and_3'
KB668221	247680	247738	Rev	AFUN001473-RA	3_of_5	5'_and_3'
KB668221	248465	248531	Rev	AFUN001473-RA	2_of_5	5'_and_3'
KB668221	248903	250152	Rev	AFUN001473-RA	1_of_5	5'_and_3'
KB668221	256942	257023	Rev	AFUN001474-RA	4_of_4	5'_and_3'
KB668221	257189	260597	Rev	AFUN001474-RA	3_of_4	5'_and_3'
KB668221	260707	263861	Rev	AFUN001474-RA	2_of_4	3'_only
KB668221	265392	266288	Rev	AFUN001474-RA	1_of_4
KB668221	308100	308160	Rev	AFUN001475-RA	2_of_2	5'_and_3'
KB668221	308387	308455	Rev	AFUN001475-RA	1_of_2	5'_and_3'
KB668221	317601	321488	Fwd	AFUN001476-RA	1_of_9
KB668221	321891	321971	Fwd	AFUN001476-RA	2_of_9	5'_and_3'
KB668221	322128	322207	Fwd	AFUN001476-RA	3_of_9	5'_and_3'
KB668221	324927	324996	Fwd	AFUN001476-RA	4_of_9	5'_and_3'
KB668221	325456	326211	Fwd	AFUN001476-RA	5_of_9
KB668221	327463	327540	Fwd	AFUN001476-RA	6_of_9	5'_and_3'
KB668221	327616	327691	Fwd	AFUN001476-RA	7_of_9	5'_and_3'
KB668221	327847	327946	Fwd	AFUN001476-RA	8_of_9	5'_and_3'
KB668221	330517	330536	Fwd	AFUN001476-RA	9_of_9
KB668221	331772	333647	Fwd	AFUN001477-RA	1_of_2	5'_and_3'
KB668221	333877	334246	Fwd	AFUN001477-RA	2_of_2	5'_and_3'
KB668221	340079	340140	Fwd	AFUN001478-RA	1_of_2
KB668221	340306	340381	Fwd	AFUN001478-RA	2_of_2
KB668221	340573	340651	Rev	AFUN001479-RA	2_of_2
KB668221	340802	341217	Rev	AFUN001479-RA	1_of_2	3'_only
KB668221	342066	342134	Rev	AFUN001480-RA	9_of_9
KB668221	342228	342314	Rev	AFUN001480-RA	8_of_9	5'_and_3'
KB668221	342393	342449	Rev	AFUN001480-RA	7_of_9	5'_and_3'
KB668221	342527	342582	Rev	AFUN001480-RA	6_of_9
KB668221	342682	342743	Rev	AFUN001480-RA	5_of_9
KB668221	343492	343782	Rev	AFUN001480-RA	4_of_9
KB668221	343921	343985	Rev	AFUN001480-RA	3_of_9	5'_and_3'
KB668221	344417	344482	Rev	AFUN001480-RA	2_of_9	5'_and_3'
KB668221	344979	345054	Rev	AFUN001480-RA	1_of_9	5'_and_3'
KB668221	346011	346082	Fwd	AFUN001481-RA	1_of_5	5'_and_3'
KB668221	346198	346278	Fwd	AFUN001481-RA	2_of_5	5'_and_3'
KB668221	346884	346951	Fwd	AFUN001481-RA	3_of_5	5'_and_3'
KB668221	347544	347628	Fwd	AFUN001481-RA	4_of_5	5'_and_3'
KB668221	347746	347811	Fwd	AFUN001481-RA	5_of_5	5'_and_3'
KB668221	354068	354813	Rev	AFUN001483-RA	7_of_7	5'_and_3'
KB668221	355333	355417	Rev	AFUN001483-RA	6_of_7	5'_and_3'
KB668221	355613	357425	Rev	AFUN001483-RA	5_of_7	5'_and_3'
KB668221	357496	359859	Rev	AFUN001483-RA	4_of_7
KB668221	360434	360511	Rev	AFUN001483-RA	3_of_7	5'_and_3'
KB668221	360786	360846	Rev	AFUN001483-RA	2_of_7	5'_and_3'
KB668221	361060	361741	Rev	AFUN001483-RA	1_of_7	5'_and_3'
KB668221	362966	363034	Fwd	AFUN001484-RA	1_of_2	5'_and_3'
KB668221	363084	363153	Fwd	AFUN001484-RA	2_of_2	5'_and_3'
KB668221	366699	366772	Rev	AFUN001485-RA	8_of_8	5'_and_3'
KB668221	366983	367062	Rev	AFUN001485-RA	7_of_8	5'_and_3'
KB668221	367139	369117	Rev	AFUN001485-RA	6_of_8	5'_and_3'
KB668221	369226	369299	Rev	AFUN001485-RA	5_of_8	5'_and_3'
KB668221	369809	369891	Rev	AFUN001485-RA	4_of_8	5'_and_3'
KB668221	371776	372239	Rev	AFUN001485-RA	3_of_8	5'_and_3'
KB668221	372354	374330	Rev	AFUN001485-RA	2_of_8	5'_and_3'
KB668221	374860	374933	Rev	AFUN001485-RA	1_of_8	5'_and_3'
KB668221	397959	398026	Fwd	AFUN001486-RA	1_of_2	5'_and_3'
KB668221	398110	398182	Fwd	AFUN001486-RA	2_of_2	5'_and_3'
KB668221	399053	399194	Rev	AFUN001487-RA	2_of_2	5'_and_3'
KB668221	399407	399478	Rev	AFUN001487-RA	1_of_2	5'_and_3'
KB668221	412305	414586	Fwd	AFUN001488-RA	1_of_6
KB668221	414780	417478	Fwd	AFUN001488-RA	2_of_6	5'_and_3'
KB668221	419241	419316	Fwd	AFUN001488-RA	3_of_6	5'_and_3'
KB668221	419476	419550	Fwd	AFUN001488-RA	4_of_6	5'_and_3'
KB668221	419686	419755	Fwd	AFUN001488-RA	5_of_6	5'_and_3'
KB668221	421619	421766	Fwd	AFUN001488-RA	6_of_6
KB668221	421619	421766	Rev	AFUN001489-RA	3_of_3
KB668221	422544	422614	Rev	AFUN001489-RA	2_of_3
KB668221	422851	422924	Rev	AFUN001489-RA	1_of_3
KB668221	425829	425939	Fwd	AFUN001490-RA	1_of_4
KB668221	426083	426318	Fwd	AFUN001490-RA	2_of_4
KB668221	428840	428974	Fwd	AFUN001490-RA	3_of_4
KB668221	429079	429144	Fwd	AFUN001490-RA	4_of_4
KB668221	437023	437089	Rev	AFUN001492-RA	6_of_6	5'_and_3'
KB668221	437580	437674	Rev	AFUN001492-RA	5_of_6	5'_and_3'
KB668221	442370	442467	Rev	AFUN001492-RA	4_of_6	5'_and_3'
KB668221	443447	443523	Rev	AFUN001492-RA	3_of_6	5'_and_3'
KB668221	444826	444897	Rev	AFUN001492-RA	2_of_6	5'_and_3'
KB668221	445807	445876	Rev	AFUN001492-RA	1_of_6	5'_and_3'
KB668221	455598	455885	Fwd	AFUN001493-RA	1_of_11
KB668221	456050	456526	Fwd	AFUN001493-RA	2_of_11	5'_and_3'
KB668221	456939	460163	Fwd	AFUN001493-RA	3_of_11	5'_and_3'
KB668221	460206	460312	Fwd	AFUN001493-RA	4_of_11	5'_and_3'
KB668221	460454	460588	Fwd	AFUN001493-RA	5_of_11	5'_and_3'
KB668221	461000	461494	Fwd	AFUN001493-RA	6_of_11	5'_and_3'
KB668221	461666	463772	Fwd	AFUN001493-RA	7_of_11	5'_and_3'
KB668221	463856	467001	Fwd	AFUN001493-RA	8_of_11	5'_and_3'
KB668221	467051	467114	Fwd	AFUN001493-RA	9_of_11	5'_and_3'
KB668221	467292	467365	Fwd	AFUN001493-RA	10_of_11	5'_and_3'
KB668221	468392	468459	Fwd	AFUN001493-RA	11_of_11	5'_and_3'
KB668221	472305	473253	Fwd	AFUN014186-RA	1_of_1
KB668221	493014	493082	Fwd	AFUN001494-RA	1_of_4	5'_and_3'
KB668221	493280	493650	Fwd	AFUN001494-RA	2_of_4	5'_and_3'
KB668221	493907	494028	Fwd	AFUN001494-RA	3_of_4	5'_and_3'
KB668221	494158	494231	Fwd	AFUN001494-RA	4_of_4	5'_and_3'
KB668221	610681	610751	Rev	AFUN001495-RA	1_of_1	5'_and_3'
KB668221	612947	613003	Fwd	AFUN001496-RA	1_of_2	5'_and_3'
KB668221	613421	613487	Fwd	AFUN001496-RA	2_of_2	5'_and_3'
KB668221	618804	618889	Fwd	AFUN001498-RA	1_of_3	3'_only
KB668221	619355	619453	Fwd	AFUN001498-RA	2_of_3
KB668221	620315	620384	Fwd	AFUN001498-RA	3_of_3	5'_and_3'
KB668221	622481	622545	Fwd	AFUN001499-RA	1_of_2	5'_and_3'
KB668221	622718	622782	Fwd	AFUN001499-RA	2_of_2	5'_and_3'
KB668221	625049	625110	Rev	AFUN001501-RA	2_of_2	5'_and_3'
KB668221	625472	625544	Rev	AFUN001501-RA	1_of_2	5'_and_3'
KB668221	641542	641958	Fwd	AFUN001502-RA	1_of_3	5'_and_3'
KB668221	642151	642222	Fwd	AFUN001502-RA	2_of_3	5'_and_3'
KB668221	642644	642719	Fwd	AFUN001502-RA	3_of_3	5'_and_3'
KB668221	688134	689716	Fwd	AFUN001503-RA	1_of_1	3'_only
KB668221	697389	697474	Fwd	AFUN001504-RA	1_of_4	5'_and_3'
KB668221	697593	697682	Fwd	AFUN001504-RA	2_of_4	5'_and_3'
KB668221	697835	697945	Fwd	AFUN001504-RA	3_of_4	5'_and_3'
KB668221	698138	698615	Fwd	AFUN001504-RA	4_of_4	5'_only
KB668221	702914	704618	Fwd	AFUN001505-RA	1_of_10
KB668221	704840	704946	Fwd	AFUN001505-RA	2_of_10	5'_and_3'
KB668221	705194	705262	Fwd	AFUN001505-RA	3_of_10	5'_and_3'
KB668221	705424	705699	Fwd	AFUN001505-RA	4_of_10	5'_and_3'
KB668221	705962	708965	Fwd	AFUN001505-RA	5_of_10	5'_and_3'
KB668221	709175	709664	Fwd	AFUN001505-RA	6_of_10	5'_and_3'
KB668221	709839	711606	Fwd	AFUN001505-RA	7_of_10	5'_and_3'
KB668221	712045	712126	Fwd	AFUN001505-RA	8_of_10	5'_and_3'
KB668221	712367	713112	Fwd	AFUN001505-RA	9_of_10	5'_and_3'
KB668221	713417	716691	Fwd	AFUN001505-RA	10_of_10	5'_and_3'
KB668221	736309	736384	Rev	AFUN001507-RA	1_of_1	5'_and_3'
KB668221	739374	740349	Fwd	AFUN001508-RA	1_of_2	5'_only
KB668221	740462	740695	Fwd	AFUN001508-RA	2_of_2
KB668221	743463	744211	Fwd	AFUN001509-RA	1_of_5	3'_only
KB668221	744369	744435	Fwd	AFUN001509-RA	2_of_5	5'_and_3'
KB668221	745195	745485	Fwd	AFUN001509-RA	3_of_5
KB668221	746898	747858	Fwd	AFUN001509-RA	4_of_5	5'_and_3'
KB668221	748125	748324	Fwd	AFUN001509-RA	5_of_5	5'_and_3'
KB668221	756943	757012	Rev	AFUN001510-RA	4_of_4	5'_and_3'
KB668221	759306	759386	Rev	AFUN001510-RA	3_of_4	5'_and_3'
KB668221	759560	759637	Rev	AFUN001510-RA	2_of_4	5'_and_3'
KB668221	759854	763585	Rev	AFUN001510-RA	1_of_4	5'_and_3'
KB668221	769014	769721	Fwd	AFUN001511-RA	1_of_3	5'_and_3'
KB668221	769867	769968	Fwd	AFUN001511-RA	2_of_3	5'_and_3'
KB668221	770181	770250	Fwd	AFUN001511-RA	3_of_3	5'_and_3'
KB668221	772752	772859	Rev	AFUN001512-RA	2_of_2	5'_and_3'
KB668221	773082	773153	Rev	AFUN001512-RA	1_of_2	5'_and_3'
KB668221	774521	774670	Fwd	AFUN001514-RA	1_of_4	5'_and_3'
KB668221	774760	774870	Fwd	AFUN001514-RA	2_of_4	5'_and_3'
KB668221	775245	776441	Fwd	AFUN001514-RA	3_of_4	5'_and_3'
KB668221	777255	777604	Fwd	AFUN001514-RA	4_of_4	5'_and_3'
KB668221	779004	779073	Rev	AFUN001515-RA	1_of_1
KB668221	785959	786041	Fwd	AFUN001516-RA	1_of_1	5'_and_3'
KB668221	788940	789006	Rev	AFUN001517-RA	1_of_1	5'_and_3'
KB668221	812907	814473	Fwd	AFUN001518-RA	1_of_1
KB668221	826221	830419	Fwd	AFUN001519-RA	1_of_5
KB668221	830908	831421	Fwd	AFUN001519-RA	2_of_5
KB668221	834176	834432	Fwd	AFUN001519-RA	3_of_5
KB668221	834948	835019	Fwd	AFUN001519-RA	4_of_5
KB668221	835151	835220	Fwd	AFUN001519-RA	5_of_5	5'_and_3'
KB668221	837407	837492	Rev	AFUN001520-RA	2_of_2
KB668221	837673	837748	Rev	AFUN001520-RA	1_of_2
KB668221	844696	845077	Rev	AFUN001521-RA	8_of_8
KB668221	845171	845229	Rev	AFUN001521-RA	7_of_8
KB668221	845426	845493	Rev	AFUN001521-RA	6_of_8
KB668221	846010	846073	Rev	AFUN001521-RA	5_of_8
KB668221	846493	846566	Rev	AFUN001521-RA	4_of_8
KB668221	846833	846918	Rev	AFUN001521-RA	3_of_8
KB668221	847041	847359	Rev	AFUN001521-RA	2_of_8
KB668221	847458	847532	Rev	AFUN001521-RA	1_of_8
KB668221	849469	850044	Fwd	AFUN001522-RA	1_of_5
KB668221	850803	853648	Fwd	AFUN001522-RA	2_of_5
KB668221	853669	853875	Fwd	AFUN001522-RA	3_of_5
KB668221	854069	854151	Fwd	AFUN001522-RA	4_of_5
KB668221	854386	854456	Fwd	AFUN001522-RA	5_of_5
KB668221	889186	889250	Fwd	AFUN001523-RA	1_of_2	5'_and_3'
KB668221	889373	889446	Fwd	AFUN001523-RA	2_of_2	5'_and_3'
KB668221	891886	891944	Rev	AFUN001524-RA	1_of_1
KB668221	902846	903021	Rev	AFUN001525-RA	2_of_2	5'_and_3'
KB668221	905434	905541	Rev	AFUN001525-RA	1_of_2	3'_only
KB668221	911139	912557	Rev	AFUN001526-RA	4_of_4	5'_only
KB668221	912654	912879	Rev	AFUN001526-RA	3_of_4	5'_and_3'
KB668221	912940	912971	Rev	AFUN001526-RA	2_of_4	3'_only
KB668221	913422	913497	Rev	AFUN001526-RA	1_of_4	5'_and_3'
KB668221	942312	942373	Fwd	AFUN001527-RA	1_of_1
KB668221	963523	963622	Rev	AFUN014187-RA	1_of_1
KB668221	971788	974130	Rev	AFUN001528-RA	3_of_3	5'_and_3'
KB668221	974245	977806	Rev	AFUN001528-RA	2_of_3	5'_and_3'
KB668221	978111	978186	Rev	AFUN001528-RA	1_of_3	5'_and_3'
KB668221	988001	988784	Fwd	AFUN001529-RA	1_of_11
KB668221	990585	992916	Fwd	AFUN001529-RA	2_of_11	5'_and_3'
KB668221	994964	995268	Fwd	AFUN001529-RA	3_of_11	5'_and_3'
KB668221	995674	995767	Fwd	AFUN001529-RA	4_of_11	5'_and_3'
KB668221	995929	997611	Fwd	AFUN001529-RA	5_of_11	5'_and_3'
KB668221	997882	997958	Fwd	AFUN001529-RA	6_of_11	5'_and_3'
KB668221	998200	998285	Fwd	AFUN001529-RA	7_of_11	5'_and_3'
KB668221	998397	998481	Fwd	AFUN001529-RA	8_of_11	5'_and_3'
KB668221	998969	999074	Fwd	AFUN001529-RA	9_of_11	5'_and_3'
KB668221	999151	999275	Fwd	AFUN001529-RA	10_of_11	5'_and_3'
KB668221	999383	999487	Fwd	AFUN001529-RA	11_of_11	5'_and_3'
KB668221	1010046	1012778	Fwd	AFUN001530-RA	1_of_2	5'_and_3'
KB668221	1013117	1013837	Fwd	AFUN001530-RA	2_of_2
KB668221	1015001	1015229	Rev	AFUN001531-RA	2_of_2	3'_only
KB668221	1016113	1016262	Rev	AFUN001531-RA	1_of_2	5'_and_3'
KB668221	1016711	1017571	Fwd	AFUN001532-RA	1_of_15
KB668221	1017598	1017956	Fwd	AFUN001532-RA	2_of_15
KB668221	1018676	1018812	Fwd	AFUN001532-RA	3_of_15	5'_and_3'
KB668221	1018963	1019063	Fwd	AFUN001532-RA	4_of_15	5'_and_3'
KB668221	1020767	1021926	Fwd	AFUN001532-RA	5_of_15
KB668221	1022612	1022785	Fwd	AFUN001532-RA	6_of_15	5'_and_3'
KB668221	1022936	1022997	Fwd	AFUN001532-RA	7_of_15
KB668221	1024712	1024981	Fwd	AFUN001532-RA	8_of_15
KB668221	1025044	1027147	Fwd	AFUN001532-RA	9_of_15
KB668221	1025274	1025353	Rev	AFUN001533-RA	2_of_2	5'_and_3'
KB668221	1025486	1025556	Rev	AFUN001533-RA	1_of_2	5'_and_3'
KB668221	1027289	1027354	Fwd	AFUN001532-RA	10_of_15	5'_and_3'
KB668221	1028087	1028158	Fwd	AFUN001532-RA	11_of_15	5'_and_3'
KB668221	1028265	1028339	Fwd	AFUN001532-RA	12_of_15	5'_and_3'
KB668221	1028474	1029119	Fwd	AFUN001532-RA	13_of_15
KB668221	1029354	1029422	Fwd	AFUN001532-RA	14_of_15	5'_and_3'
KB668221	1030282	1030351	Fwd	AFUN001532-RA	15_of_15	5'_and_3'
KB668221	1031290	1031376	Rev	AFUN001534-RA	5_of_5	5'_and_3'
KB668221	1031594	1031657	Rev	AFUN001534-RA	4_of_5
KB668221	1031952	1032056	Rev	AFUN001534-RA	3_of_5	5'_and_3'
KB668221	1032606	1033669	Rev	AFUN001534-RA	2_of_5
KB668221	1033843	1033902	Rev	AFUN001534-RA	1_of_5	5'_and_3'
KB668221	1041797	1041863	Rev	AFUN001535-RA	6_of_6
KB668221	1042027	1042094	Rev	AFUN001535-RA	5_of_6	5'_and_3'
KB668221	1042452	1047031	Rev	AFUN001535-RA	4_of_6
KB668221	1043855	1043929	Fwd	AFUN001536-RA	1_of_6
KB668221	1044447	1044509	Fwd	AFUN001536-RA	2_of_6	5'_and_3'
KB668221	1044679	1045441	Fwd	AFUN001536-RA	3_of_6
KB668221	1045760	1045817	Fwd	AFUN001536-RA	4_of_6	5'_and_3'
KB668221	1045987	1046057	Fwd	AFUN001536-RA	5_of_6
KB668221	1046349	1046404	Fwd	AFUN001536-RA	6_of_6	5'_and_3'
KB668221	1047694	1047766	Rev	AFUN001535-RA	3_of_6	5'_and_3'
KB668221	1047936	1048008	Rev	AFUN001535-RA	2_of_6	5'_and_3'
KB668221	1048174	1048258	Rev	AFUN001535-RA	1_of_6	5'_and_3'
KB668221	1051837	1053092	Fwd	AFUN001537-RA	1_of_4	5'_and_3'
KB668221	1053256	1053323	Fwd	AFUN001537-RA	2_of_4	5'_and_3'
KB668221	1053621	1053696	Fwd	AFUN001537-RA	3_of_4	5'_and_3'
KB668221	1053914	1053998	Fwd	AFUN001537-RA	4_of_4	5'_and_3'
KB668221	1055082	1055359	Rev	AFUN001538-RA	3_of_3	5'_and_3'
KB668221	1055871	1056286	Rev	AFUN001538-RA	2_of_3	5'_and_3'
KB668221	1056308	1056380	Rev	AFUN001538-RA	1_of_3
KB668221	1058354	1059218	Rev	AFUN001540-RA	5_of_5
KB668221	1059410	1059646	Rev	AFUN001540-RA	4_of_5	5'_and_3'
KB668221	1059835	1060667	Rev	AFUN001540-RA	3_of_5	5'_and_3'
KB668221	1060793	1061005	Rev	AFUN001540-RA	2_of_5	5'_and_3'
KB668221	1063596	1064594	Rev	AFUN001540-RA	1_of_5	5'_and_3'
KB668221	1065667	1065746	Fwd	AFUN001541-RA	1_of_1	5'_and_3'
KB668221	1066701	1066756	Rev	AFUN001542-RA	3_of_3	5'_and_3'
KB668221	1066916	1066984	Rev	AFUN001542-RA	2_of_3	5'_and_3'
KB668221	1067844	1070603	Rev	AFUN001542-RA	1_of_3	3'_only
KB668221	1069420	1069472	Fwd	AFUN001543-RA	1_of_27	5'_only
KB668221	1069599	1069666	Fwd	AFUN001543-RA	2_of_27	5'_and_3'
KB668221	1069866	1069942	Fwd	AFUN001543-RA	3_of_27	5'_and_3'
KB668221	1070041	1070120	Fwd	AFUN001543-RA	4_of_27	5'_and_3'
KB668221	1070303	1070360	Fwd	AFUN001543-RA	5_of_27	5'_and_3'
KB668221	1070746	1070811	Fwd	AFUN001543-RA	6_of_27	5'_and_3'
KB668221	1071072	1071145	Fwd	AFUN001543-RA	7_of_27	5'_and_3'
KB668221	1071252	1071323	Fwd	AFUN001543-RA	8_of_27	5'_and_3'
KB668221	1071500	1071569	Fwd	AFUN001543-RA	9_of_27	5'_and_3'
KB668221	1071690	1071921	Fwd	AFUN001543-RA	10_of_27
KB668221	1071995	1072079	Fwd	AFUN001543-RA	11_of_27	5'_and_3'
KB668221	1072488	1074780	Fwd	AFUN001543-RA	12_of_27
KB668221	1072951	1073019	Rev	AFUN001544-RA	3_of_3	5'_and_3'
KB668221	1073107	1073172	Rev	AFUN001544-RA	2_of_3	5'_and_3'
KB668221	1073356	1073428	Rev	AFUN001544-RA	1_of_3	5'_only
KB668221	1074982	1075083	Fwd	AFUN001543-RA	13_of_27	5'_and_3'
KB668221	1075171	1076021	Fwd	AFUN001543-RA	14_of_27
KB668221	1076223	1076296	Fwd	AFUN001543-RA	15_of_27	5'_and_3'
KB668221	1076384	1076468	Fwd	AFUN001543-RA	16_of_27	5'_and_3'
KB668221	1076485	1076846	Fwd	AFUN001543-RA	17_of_27
KB668221	1076918	1076989	Fwd	AFUN001543-RA	18_of_27	5'_and_3'
KB668221	1077191	1077262	Fwd	AFUN001543-RA	19_of_27	5'_and_3'
KB668221	1077350	1078051	Fwd	AFUN001543-RA	20_of_27	5'_only
KB668221	1078103	1078174	Fwd	AFUN001543-RA	21_of_27	5'_and_3'
KB668221	1078385	1078694	Fwd	AFUN001543-RA	22_of_27	5'_and_3'
KB668221	1078785	1078850	Fwd	AFUN001543-RA	23_of_27	5'_and_3'
KB668221	1078893	1079410	Fwd	AFUN001543-RA	24_of_27
KB668221	1079513	1079584	Fwd	AFUN001543-RA	25_of_27	5'_and_3'
KB668221	1079792	1079869	Fwd	AFUN001543-RA	26_of_27	5'_and_3'
KB668221	1079960	1080037	Fwd	AFUN001543-RA	27_of_27	5'_and_3'
KB668221	1081707	1082194	Fwd	AFUN001545-RA	1_of_1
KB668221	1082999	1083070	Rev	AFUN001546-RA	1_of_1	5'_and_3'
KB668221	1094719	1094796	Rev	AFUN001547-RA	5_of_5
KB668221	1095034	1095405	Rev	AFUN001547-RA	4_of_5
KB668221	1095558	1100539	Rev	AFUN001547-RA	3_of_5
KB668221	1100613	1100688	Rev	AFUN001547-RA	2_of_5
KB668221	1100878	1101142	Rev	AFUN001547-RA	1_of_5
KB668221	1104542	1104623	Fwd	AFUN001548-RA	1_of_1
KB668221	1111308	1111820	Rev	AFUN001549-RA	3_of_3
KB668221	1111837	1113488	Rev	AFUN001549-RA	2_of_3
KB668221	1115377	1119393	Rev	AFUN001549-RA	1_of_3
KB668221	1140892	1140979	Rev	AFUN001550-RA	5_of_5
KB668221	1141152	1141400	Rev	AFUN001550-RA	4_of_5
KB668221	1141716	1142099	Rev	AFUN001550-RA	3_of_5
KB668221	1142143	1144014	Rev	AFUN001550-RA	2_of_5
KB668221	1144057	1144154	Rev	AFUN001550-RA	1_of_5
KB668221	1149182	1150113	Rev	AFUN014188-RA	1_of_1	5'_only
KB668221	1155432	1156242	Rev	AFUN014189-RA	1_of_1
KB668221	1172608	1172684	Rev	AFUN001551-RA	1_of_1
KB668221	1182405	1182666	Rev	AFUN001552-RA	1_of_1
KB668221	1189339	1189500	Rev	AFUN001553-RA	1_of_1	3'_only
KB668221	1191130	1192207	Rev	AFUN001554-RA	7_of_7	3'_only
KB668221	1192988	1193641	Rev	AFUN001554-RA	6_of_7	3'_only
KB668221	1193757	1193823	Rev	AFUN001554-RA	5_of_7
KB668221	1194945	1195161	Rev	AFUN001554-RA	4_of_7	5'_only
KB668221	1195457	1198623	Rev	AFUN001554-RA	3_of_7
KB668221	1198971	1199039	Rev	AFUN001554-RA	2_of_7
KB668221	1200456	1200643	Rev	AFUN001554-RA	1_of_7
KB668221	1202755	1202820	Fwd	AFUN001555-RA	1_of_1
KB668221	1205205	1205271	Rev	AFUN001556-RA	2_of_2
KB668221	1205443	1205524	Rev	AFUN001556-RA	1_of_2
KB668221	1210019	1210192	Fwd	AFUN001557-RA	1_of_3	3'_only
KB668221	1210421	1211664	Fwd	AFUN001557-RA	2_of_3
KB668221	1212324	1214423	Fwd	AFUN001557-RA	3_of_3	3'_only
KB668221	1221242	1223011	Fwd	AFUN001558-RA	1_of_5	5'_and_3'
KB668221	1223288	1223971	Fwd	AFUN001558-RA	2_of_5	5'_and_3'
KB668221	1224325	1224405	Fwd	AFUN001558-RA	3_of_5	5'_and_3'
KB668221	1224805	1224875	Fwd	AFUN001558-RA	4_of_5	5'_and_3'
KB668221	1225882	1225904	Fwd	AFUN001558-RA	5_of_5
KB668221	1230420	1230503	Rev	AFUN014190-RA	1_of_1
KB668221	1236494	1236650	Fwd	AFUN001559-RA	1_of_6	3'_only
KB668221	1237134	1237219	Fwd	AFUN001559-RA	2_of_6	5'_and_3'
KB668221	1237446	1237537	Fwd	AFUN001559-RA	3_of_6	5'_and_3'
KB668221	1237720	1238693	Fwd	AFUN001559-RA	4_of_6	5'_and_3'
KB668221	1241779	1241857	Fwd	AFUN001559-RA	5_of_6
KB668221	1241779	1241857	Rev	AFUN001560-RA	5_of_5	5'_and_3'
KB668221	1241990	1242047	Rev	AFUN001560-RA	4_of_5	5'_and_3'
KB668221	1241997	1242055	Fwd	AFUN001559-RA	6_of_6
KB668221	1242239	1242302	Rev	AFUN001560-RA	3_of_5	5'_and_3'
KB668221	1242410	1242474	Rev	AFUN001560-RA	2_of_5
KB668221	1242639	1242705	Rev	AFUN001560-RA	1_of_5
KB668221	1244295	1244375	Rev	AFUN001561-RA	2_of_2	5'_and_3'
KB668221	1245228	1245310	Rev	AFUN001561-RA	1_of_2	5'_and_3'
KB668221	1247444	1247576	Fwd	AFUN001562-RA	1_of_2	5'_only
KB668221	1247609	1247674	Fwd	AFUN001562-RA	2_of_2	5'_and_3'
KB668221	1256663	1256906	Rev	AFUN014191-RA	1_of_1	5'_and_3'
KB668221	1267948	1268005	Rev	AFUN014192-RA	1_of_1	5'_and_3'
KB668221	1274288	1274312	Rev	AFUN014192-RB	1_of_1
KB668221	1278024	1278103	Rev	AFUN001563-RA	3_of_3	5'_and_3'
KB668221	1278295	1278372	Rev	AFUN001563-RA	2_of_3	5'_and_3'
KB668221	1279235	1279502	Rev	AFUN001563-RA	1_of_3	5'_and_3'
KB668221	1281166	1281382	Fwd	AFUN001564-RA	1_of_1	5'_and_3'
KB668221	1283202	1283288	Rev	AFUN001565-RA	1_of_1	5'_and_3'
KB668221	1311329	1311378	Rev	AFUN014193-RA	1_of_1
KB668221	1325058	1325122	Rev	AFUN001567-RA	4_of_4
KB668221	1325306	1325378	Rev	AFUN001567-RA	3_of_4	5'_and_3'
KB668221	1325526	1325597	Rev	AFUN001567-RA	2_of_4	5'_and_3'
KB668221	1325894	1326626	Rev	AFUN001567-RA	1_of_4	5'_and_3'
KB668221	1327424	1327504	Fwd	AFUN001568-RA	1_of_2	5'_and_3'
KB668221	1327934	1329532	Fwd	AFUN001568-RA	2_of_2
KB668221	1337020	1340254	Fwd	AFUN001569-RA	1_of_9	5'_and_3'
KB668221	1340766	1340892	Fwd	AFUN001569-RA	2_of_9	5'_and_3'
KB668221	1342043	1342107	Fwd	AFUN001569-RA	3_of_9	5'_and_3'
KB668221	1342298	1342369	Fwd	AFUN001569-RA	4_of_9	5'_and_3'
KB668221	1342607	1342690	Fwd	AFUN001569-RA	5_of_9	5'_and_3'
KB668221	1342740	1344601	Fwd	AFUN001569-RA	6_of_9
KB668221	1344753	1344966	Fwd	AFUN001569-RA	7_of_9	5'_and_3'
KB668221	1346220	1346290	Fwd	AFUN001569-RA	8_of_9	5'_and_3'
KB668221	1346418	1346480	Fwd	AFUN001569-RA	9_of_9	5'_and_3'
KB668221	1351000	1351061	Rev	AFUN001570-RA	3_of_3
KB668221	1351265	1351333	Rev	AFUN001570-RA	2_of_3	5'_and_3'
KB668221	1352414	1352526	Rev	AFUN001570-RA	1_of_3
KB668221	1352414	1352490	Fwd	AFUN014194-RA	1_of_1
KB668221	1353237	1355987	Fwd	AFUN001571-RA	1_of_5	5'_and_3'
KB668221	1354347	1354405	Rev	AFUN001572-RA	2_of_2	5'_and_3'
KB668221	1354591	1354760	Rev	AFUN001572-RA	1_of_2
KB668221	1356138	1356268	Fwd	AFUN001571-RA	2_of_5	5'_and_3'
KB668221	1356426	1357363	Fwd	AFUN001571-RA	3_of_5	5'_and_3'
KB668221	1357730	1358156	Fwd	AFUN001571-RA	4_of_5
KB668221	1358494	1358574	Fwd	AFUN001571-RA	5_of_5	5'_and_3'
KB668221	1368422	1368457	Rev	AFUN001573-RA	9_of_9
KB668221	1368477	1370691	Rev	AFUN001573-RA	8_of_9
KB668221	1371138	1372055	Rev	AFUN001573-RA	7_of_9	5'_and_3'
KB668221	1372269	1374316	Rev	AFUN001573-RA	6_of_9
KB668221	1374836	1377085	Rev	AFUN001573-RA	5_of_9
KB668221	1377186	1378024	Rev	AFUN001573-RA	4_of_9	5'_and_3'
KB668221	1378191	1378414	Rev	AFUN001573-RA	3_of_9	5'_and_3'
KB668221	1378591	1379734	Rev	AFUN001573-RA	2_of_9	5'_and_3'
KB668221	1379878	1380265	Rev	AFUN001573-RA	1_of_9	5'_and_3'
KB668221	1411356	1411452	Rev	AFUN001574-RA	2_of_2
KB668221	1411872	1411942	Rev	AFUN001574-RA	1_of_2
KB668221	1479522	1479589	Fwd	AFUN001575-RA	1_of_1
KB668221	1540831	1540912	Rev	AFUN001576-RA	3_of_3	5'_and_3'
KB668221	1541041	1541929	Rev	AFUN001576-RA	2_of_3	5'_and_3'
KB668221	1542217	1547604	Rev	AFUN001576-RA	1_of_3	5'_and_3'
KB668221	1544291	1544456	Fwd	AFUN001577-RA	1_of_1
KB668221	1549374	1549624	Rev	AFUN001578-RA	1_of_1	5'_and_3'
KB668221	1550147	1550202	Fwd	AFUN001579-RA	1_of_2
KB668221	1550522	1550596	Fwd	AFUN001579-RA	2_of_2	5'_and_3'
KB668221	1551720	1551793	Rev	AFUN001580-RA	2_of_2	5'_and_3'
KB668221	1551885	1551957	Rev	AFUN001580-RA	1_of_2	5'_only
KB668221	1553503	1553571	Fwd	AFUN001581-RA	1_of_5	5'_and_3'
KB668221	1553605	1553680	Fwd	AFUN001581-RA	2_of_5	5'_and_3'
KB668221	1554040	1554387	Fwd	AFUN001581-RA	3_of_5
KB668221	1554513	1554600	Fwd	AFUN001581-RA	4_of_5	5'_and_3'
KB668221	1554722	1554801	Fwd	AFUN001581-RA	5_of_5	5'_and_3'
KB668221	1556338	1556444	Rev	AFUN001582-RA	1_of_1	5'_and_3'
KB668221	1557372	1557732	Rev	AFUN001583-RA	2_of_2	5'_and_3'
KB668221	1557879	1557964	Rev	AFUN001583-RA	1_of_2	5'_and_3'
KB668221	1562437	1562506	Fwd	AFUN001584-RA	1_of_5	5'_and_3'
KB668221	1563832	1563905	Fwd	AFUN001584-RA	2_of_5	5'_and_3'
KB668221	1564637	1564719	Fwd	AFUN001584-RA	3_of_5	5'_and_3'
KB668221	1565082	1565191	Fwd	AFUN001584-RA	4_of_5	5'_and_3'
KB668221	1566486	1566507	Fwd	AFUN001584-RA	5_of_5
KB668221	1574285	1575338	Rev	AFUN001585-RA	10_of_10	3'_only
KB668221	1575453	1575855	Rev	AFUN001585-RA	9_of_10	5'_only
KB668221	1576061	1576623	Rev	AFUN001585-RA	8_of_10	5'_and_3'
KB668221	1576707	1576784	Rev	AFUN001585-RA	7_of_10	5'_and_3'
KB668221	1576850	1576918	Rev	AFUN001585-RA	6_of_10	5'_and_3'
KB668221	1577090	1577187	Rev	AFUN001585-RA	5_of_10	5'_and_3'
KB668221	1577338	1577637	Rev	AFUN001585-RA	4_of_10	5'_and_3'
KB668221	1577784	1577904	Rev	AFUN001585-RA	3_of_10	5'_and_3'
KB668221	1578038	1578106	Rev	AFUN001585-RA	2_of_10	5'_and_3'
KB668221	1578540	1579212	Rev	AFUN001585-RA	1_of_10	5'_and_3'
KB668221	1582735	1582797	Rev	AFUN001586-RA	2_of_2	5'_and_3'
KB668221	1584215	1584274	Rev	AFUN001586-RA	1_of_2	5'_and_3'
KB668221	1586298	1586362	Rev	AFUN001587-RA	2_of_2	5'_and_3'
KB668221	1586704	1586769	Rev	AFUN001587-RA	1_of_2	5'_and_3'
KB668221	1588323	1588391	Rev	AFUN001588-RA	1_of_1	5'_and_3'
KB668221	1589933	1589997	Fwd	AFUN001589-RA	1_of_5	5'_and_3'
KB668221	1590172	1590238	Fwd	AFUN001589-RA	2_of_5	5'_and_3'
KB668221	1590426	1590485	Fwd	AFUN001589-RA	3_of_5	5'_and_3'
KB668221	1590633	1590715	Fwd	AFUN001589-RA	4_of_5	5'_and_3'
KB668221	1591108	1592659	Fwd	AFUN001589-RA	5_of_5
KB668221	1595587	1595674	Rev	AFUN001590-RA	5_of_5	5'_and_3'
KB668221	1595785	1597390	Rev	AFUN001590-RA	4_of_5	5'_and_3'
KB668221	1597426	1598318	Rev	AFUN001590-RA	3_of_5	5'_and_3'
KB668221	1598425	1598712	Rev	AFUN001590-RA	2_of_5	5'_and_3'
KB668221	1598893	1599162	Rev	AFUN001590-RA	1_of_5	5'_and_3'
KB668221	1599764	1600270	Fwd	AFUN001591-RA	1_of_5	5'_and_3'
KB668221	1600491	1600603	Fwd	AFUN001591-RA	2_of_5	5'_and_3'
KB668221	1600805	1602205	Fwd	AFUN001591-RA	3_of_5	5'_and_3'
KB668221	1602431	1602508	Fwd	AFUN001591-RA	4_of_5	5'_and_3'
KB668221	1604204	1604351	Rev	AFUN001592-RA	6_of_6	5'_and_3'
KB668221	1605912	1606366	Rev	AFUN001592-RA	5_of_6
KB668221	1605914	1606047	Fwd	AFUN001591-RA	5_of_5
KB668221	1606643	1606712	Rev	AFUN001592-RA	4_of_6	5'_and_3'
KB668221	1607094	1607196	Rev	AFUN001592-RA	3_of_6	5'_and_3'
KB668221	1607485	1607555	Rev	AFUN001592-RA	2_of_6	5'_and_3'
KB668221	1608084	1608153	Rev	AFUN001592-RA	1_of_6	5'_and_3'
KB668221	1608715	1608787	Fwd	AFUN001593-RA	1_of_6	5'_and_3'
KB668221	1609085	1609170	Fwd	AFUN001593-RA	2_of_6	5'_and_3'
KB668221	1609462	1609532	Fwd	AFUN001593-RA	3_of_6	5'_and_3'
KB668221	1609806	1609875	Fwd	AFUN001593-RA	4_of_6	3'_only
KB668221	1611904	1611986	Fwd	AFUN001593-RA	5_of_6	5'_and_3'
KB668221	1612184	1612262	Fwd	AFUN001593-RA	6_of_6	5'_and_3'
KB668221	1615134	1615204	Rev	AFUN001594-RA	1_of_1	5'_and_3'
KB668221	1638000	1639451	Fwd	AFUN001595-RA	1_of_6	3'_only
KB668221	1639863	1640513	Fwd	AFUN001595-RA	2_of_6	5'_and_3'
KB668221	1640835	1640886	Fwd	AFUN001595-RA	3_of_6	3'_only
KB668221	1641127	1641228	Fwd	AFUN001595-RA	4_of_6	5'_and_3'
KB668221	1641808	1641900	Fwd	AFUN001595-RA	5_of_6	5'_and_3'
KB668221	1642048	1642138	Fwd	AFUN001595-RA	6_of_6	5'_and_3'
KB668221	1649408	1653257	Fwd	AFUN001596-RA	1_of_2	5'_and_3'
KB668221	1653405	1654532	Fwd	AFUN001596-RA	2_of_2	5'_and_3'
KB668221	1657031	1657638	Fwd	AFUN001597-RA	1_of_5	5'_only
KB668221	1658107	1658169	Fwd	AFUN001597-RA	2_of_5	5'_and_3'
KB668221	1658328	1658385	Fwd	AFUN001597-RA	3_of_5	5'_and_3'
KB668221	1658470	1658546	Fwd	AFUN001597-RA	4_of_5	5'_and_3'
KB668221	1659049	1659707	Fwd	AFUN001597-RA	5_of_5
KB668221	1662787	1664376	Fwd	AFUN001598-RA	1_of_3	5'_and_3'
KB668221	1664781	1664851	Fwd	AFUN001598-RA	2_of_3	5'_and_3'
KB668221	1665163	1665237	Fwd	AFUN001598-RA	3_of_3	5'_and_3'
KB668221	1675273	1679168	Fwd	AFUN001599-RA	1_of_3	5'_and_3'
KB668221	1679836	1679911	Fwd	AFUN001599-RA	2_of_3	5'_and_3'
KB668221	1680670	1680750	Fwd	AFUN001599-RA	3_of_3	5'_and_3'
KB668221	1687417	1691464	Fwd	AFUN001600-RA	1_of_25	5'_and_3'
KB668221	1692091	1692677	Fwd	AFUN001600-RA	2_of_25	5'_and_3'
KB668221	1692700	1693115	Fwd	AFUN001600-RA	3_of_25	5'_and_3'
KB668221	1693279	1693350	Fwd	AFUN001600-RA	4_of_25	5'_and_3'
KB668221	1693493	1694417	Fwd	AFUN001600-RA	5_of_25	5'_and_3'
KB668221	1694554	1694759	Fwd	AFUN001600-RA	6_of_25	5'_and_3'
KB668221	1694964	1695197	Fwd	AFUN001600-RA	7_of_25	5'_and_3'
KB668221	1695500	1696452	Fwd	AFUN001600-RA	8_of_25	5'_and_3'
KB668221	1697080	1697148	Fwd	AFUN001600-RA	9_of_25	5'_and_3'
KB668221	1698315	1698392	Fwd	AFUN001600-RA	10_of_25	5'_and_3'
KB668221	1698513	1699962	Fwd	AFUN001600-RA	11_of_25	5'_and_3'
KB668221	1700114	1700279	Fwd	AFUN001600-RA	12_of_25	5'_and_3'
KB668221	1700654	1700789	Fwd	AFUN001600-RA	13_of_25	5'_and_3'
KB668221	1700916	1700985	Fwd	AFUN001600-RA	14_of_25	5'_and_3'
KB668221	1701683	1701745	Fwd	AFUN001600-RA	15_of_25	5'_and_3'
KB668221	1702100	1702217	Fwd	AFUN001600-RA	16_of_25	5'_and_3'
KB668221	1703628	1703828	Fwd	AFUN001600-RA	17_of_25	5'_and_3'
KB668221	1704132	1704428	Fwd	AFUN001600-RA	18_of_25	5'_and_3'
KB668221	1705323	1705434	Fwd	AFUN001600-RA	19_of_25	5'_and_3'
KB668221	1706326	1706497	Fwd	AFUN001600-RA	20_of_25	5'_and_3'
KB668221	1709162	1709227	Fwd	AFUN001600-RA	21_of_25	5'_and_3'
KB668221	1709510	1709582	Fwd	AFUN001600-RA	22_of_25	5'_and_3'
KB668221	1709907	1709957	Fwd	AFUN001600-RA	23_of_25	3'_only
KB668221	1721937	1722012	Fwd	AFUN001600-RA	24_of_25	5'_and_3'
KB668221	1722316	1722393	Fwd	AFUN001600-RA	25_of_25	5'_and_3'
KB668221	1782356	1782377	Rev	AFUN014195-RA	1_of_1
KB668221	1838385	1838483	Fwd	AFUN001601-RA	1_of_9	5'_and_3'
KB668221	1838609	1838730	Fwd	AFUN001601-RA	2_of_9	5'_and_3'
KB668221	1838844	1838900	Fwd	AFUN001601-RA	3_of_9	3'_only
KB668221	1839110	1839213	Fwd	AFUN001601-RA	4_of_9	5'_and_3'
KB668221	1839367	1839430	Fwd	AFUN001601-RA	5_of_9	5'_and_3'
KB668221	1839577	1839691	Fwd	AFUN001601-RA	6_of_9	5'_and_3'
KB668221	1839887	1840093	Fwd	AFUN001601-RA	7_of_9
KB668221	1841063	1841126	Fwd	AFUN001601-RA	8_of_9	5'_and_3'
KB668221	1841274	1841350	Fwd	AFUN001601-RA	9_of_9	5'_and_3'
KB668221	1856582	1856643	Fwd	AFUN001602-RA	1_of_5
KB668221	1856796	1857566	Fwd	AFUN001602-RA	2_of_5
KB668221	1857685	1857865	Fwd	AFUN001602-RA	3_of_5
KB668221	1858016	1859814	Fwd	AFUN001602-RA	4_of_5
KB668221	1860020	1860286	Fwd	AFUN001602-RA	5_of_5
KB668221	1861664	1861729	Rev	AFUN001603-RA	1_of_1
KB668221	1868559	1868622	Rev	AFUN001605-RA	3_of_3	5'_and_3'
KB668221	1868792	1868852	Rev	AFUN001605-RA	2_of_3	5'_and_3'
KB668221	1869097	1869154	Rev	AFUN001605-RA	1_of_3	5'_and_3'
KB668221	1870036	1870101	Fwd	AFUN001606-RA	1_of_8
KB668221	1870529	1870590	Fwd	AFUN001606-RA	2_of_8	5'_and_3'
KB668221	1871000	1871068	Fwd	AFUN001606-RA	3_of_8	5'_and_3'
KB668221	1871161	1871481	Fwd	AFUN001606-RA	4_of_8
KB668221	1871655	1871719	Fwd	AFUN001606-RA	5_of_8	5'_and_3'
KB668221	1872150	1872218	Fwd	AFUN001606-RA	6_of_8	5'_and_3'
KB668221	1872628	1872702	Fwd	AFUN001606-RA	7_of_8	5'_and_3'
KB668221	1872806	1872870	Fwd	AFUN001606-RA	8_of_8
KB668221	1875757	1876653	Rev	AFUN001607-RA	7_of_7	5'_and_3'
KB668221	1876907	1876993	Rev	AFUN001607-RA	6_of_7	5'_and_3'
KB668221	1877224	1877386	Rev	AFUN001607-RA	5_of_7	5'_and_3'
KB668221	1877602	1877839	Rev	AFUN001607-RA	4_of_7	5'_and_3'
KB668221	1877934	1879045	Rev	AFUN001607-RA	3_of_7	5'_and_3'
KB668221	1879172	1879557	Rev	AFUN001607-RA	2_of_7	5'_and_3'
KB668221	1879805	1880061	Rev	AFUN001607-RA	1_of_7	5'_and_3'
KB668221	1886838	1886966	Fwd	AFUN014196-RA	1_of_2
KB668221	1887199	1887264	Fwd	AFUN014196-RA	2_of_2	5'_and_3'
KB668221	1887364	1887678	Rev	AFUN001608-RA	5_of_5
KB668221	1887783	1887845	Rev	AFUN001608-RA	4_of_5
KB668221	1888168	1888251	Rev	AFUN001608-RA	3_of_5
KB668221	1888385	1888474	Rev	AFUN001608-RA	2_of_5
KB668221	1889216	1891195	Rev	AFUN001608-RA	1_of_5
KB668221	1911516	1912924	Rev	AFUN001610-RA	3_of_3	5'_and_3'
KB668221	1913150	1913231	Rev	AFUN001610-RA	2_of_3	5'_and_3'
KB668221	1913643	1913792	Rev	AFUN001610-RA	1_of_3	5'_and_3'
KB668221	1915408	1915583	Fwd	AFUN001611-RA	1_of_4
KB668221	1917494	1917562	Fwd	AFUN001611-RA	2_of_4	5'_and_3'
KB668221	1917735	1917798	Fwd	AFUN001611-RA	3_of_4	5'_and_3'
KB668221	1918405	1918476	Fwd	AFUN001611-RA	4_of_4
KB668221	1920706	1920811	Rev	AFUN001612-RA	2_of_2	5'_and_3'
KB668221	1921019	1921705	Rev	AFUN001612-RA	1_of_2	5'_and_3'
KB668221	1925356	1925469	Rev	AFUN001613-RA	4_of_4	5'_and_3'
KB668221	1925712	1925795	Rev	AFUN001613-RA	3_of_4	5'_and_3'
KB668221	1925953	1926024	Rev	AFUN001613-RA	2_of_4	5'_and_3'
KB668221	1926238	1926892	Rev	AFUN001613-RA	1_of_4	5'_and_3'
KB668221	1928004	1928062	Fwd	AFUN001614-RA	1_of_1
KB668221	2021864	2023391	Rev	AFUN001615-RA	1_of_1	5'_and_3'
KB668221	2035967	2036106	Rev	AFUN001616-RA	1_of_1
KB668221	2052115	2053159	Fwd	AFUN001617-RA	1_of_1
KB668221	2077670	2078053	Fwd	AFUN001618-RA	1_of_2
KB668221	2078209	2078963	Fwd	AFUN001618-RA	2_of_2
KB668221	2084111	2086552	Fwd	AFUN001619-RA	1_of_3	5'_and_3'
KB668221	2086802	2086865	Fwd	AFUN001619-RA	2_of_3	5'_and_3'
KB668221	2087085	2087150	Fwd	AFUN001619-RA	3_of_3	5'_and_3'
KB668221	2102007	2102070	Fwd	AFUN001620-RA	1_of_3	5'_and_3'
KB668221	2102290	2102355	Fwd	AFUN001620-RA	2_of_3	5'_and_3'
KB668221	2102494	2103534	Fwd	AFUN001620-RA	3_of_3	5'_only
KB668221	2108718	2108892	Fwd	AFUN001622-RA	1_of_2	5'_and_3'
KB668221	2109230	2109375	Fwd	AFUN001622-RA	2_of_2	5'_and_3'
KB668221	2111350	2111427	Rev	AFUN001623-RA	9_of_9	5'_and_3'
KB668221	2113861	2114264	Rev	AFUN001623-RA	8_of_9
KB668221	2114698	2114758	Rev	AFUN001623-RA	7_of_9	5'_and_3'
KB668221	2115085	2115155	Rev	AFUN001623-RA	6_of_9	5'_and_3'
KB668221	2115291	2115361	Rev	AFUN001623-RA	5_of_9	5'_and_3'
KB668221	2115477	2115556	Rev	AFUN001623-RA	4_of_9	5'_and_3'
KB668221	2115628	2115699	Rev	AFUN001623-RA	3_of_9	5'_and_3'
KB668221	2115761	2116925	Rev	AFUN001623-RA	2_of_9	5'_only
KB668221	2117178	2119835	Rev	AFUN001623-RA	1_of_9	5'_and_3'
KB668221	2142826	2142906	Fwd	AFUN001624-RA	1_of_2	5'_and_3'
KB668221	2143471	2143546	Fwd	AFUN001624-RA	2_of_2	5'_and_3'
KB668221	2163969	2164238	Fwd	AFUN001625-RA	1_of_3
KB668221	2164466	2164540	Fwd	AFUN001625-RA	2_of_3	5'_and_3'
KB668221	2164635	2166576	Fwd	AFUN001625-RA	3_of_3	5'_only
KB668221	2183623	2183707	Fwd	AFUN001626-RA	1_of_7	5'_and_3'
KB668221	2183848	2183915	Fwd	AFUN001626-RA	2_of_7	5'_and_3'
KB668221	2184041	2184373	Fwd	AFUN001626-RA	3_of_7	5'_and_3'
KB668221	2184783	2184866	Fwd	AFUN001626-RA	4_of_7	5'_and_3'
KB668221	2184995	2185064	Fwd	AFUN001626-RA	5_of_7	5'_and_3'
KB668221	2185281	2185363	Fwd	AFUN001626-RA	6_of_7	5'_and_3'
KB668221	2185515	2185579	Fwd	AFUN001626-RA	7_of_7	5'_and_3'
KB668221	2206495	2221690	Fwd	AFUN001627-RA	1_of_3	5'_only
KB668221	2222407	2222472	Fwd	AFUN001627-RA	2_of_3	5'_and_3'
KB668221	2222636	2222708	Fwd	AFUN001627-RA	3_of_3	5'_and_3'
KB668221	2225156	2229845	Rev	AFUN001628-RA	1_of_1
KB668221	2233722	2234328	Rev	AFUN001629-RA	14_of_14	5'_and_3'
KB668221	2234703	2238175	Rev	AFUN001629-RA	13_of_14
KB668221	2238762	2239322	Rev	AFUN001629-RA	12_of_14	5'_and_3'
KB668221	2240085	2241086	Rev	AFUN001629-RA	11_of_14	5'_only
KB668221	2241204	2241276	Rev	AFUN001629-RA	10_of_14	5'_and_3'
KB668221	2241464	2241541	Rev	AFUN001629-RA	9_of_14	5'_and_3'
KB668221	2242018	2242083	Rev	AFUN001629-RA	8_of_14	5'_and_3'
KB668221	2242542	2243827	Rev	AFUN001629-RA	7_of_14	5'_and_3'
KB668221	2244685	2244754	Rev	AFUN001629-RA	6_of_14	5'_and_3'
KB668221	2245315	2245397	Rev	AFUN001629-RA	5_of_14	5'_and_3'
KB668221	2245780	2245855	Rev	AFUN001629-RA	4_of_14	5'_and_3'
KB668221	2246687	2246763	Rev	AFUN001629-RA	3_of_14	5'_and_3'
KB668221	2246954	2247039	Rev	AFUN001629-RA	2_of_14	5'_and_3'
KB668221	2247164	2248160	Rev	AFUN001629-RA	1_of_14	5'_and_3'
KB668221	2263463	2268249	Rev	AFUN014197-RA	1_of_1	5'_and_3'
KB668221	2269145	2269228	Fwd	AFUN001630-RA	1_of_4	5'_and_3'
KB668221	2269357	2269418	Fwd	AFUN001630-RA	2_of_4	5'_and_3'
KB668221	2269529	2269601	Fwd	AFUN001630-RA	3_of_4	5'_and_3'
KB668221	2270570	2270640	Fwd	AFUN001630-RA	4_of_4
KB668221	2270570	2270640	Rev	AFUN001631-RA	6_of_6
KB668221	2270820	2270899	Rev	AFUN001631-RA	5_of_6
KB668221	2270992	2271067	Rev	AFUN001631-RA	4_of_6
KB668221	2271931	2272003	Rev	AFUN001631-RA	3_of_6
KB668221	2272314	2272485	Rev	AFUN001631-RA	2_of_6
KB668221	2272610	2272756	Rev	AFUN001631-RA	1_of_6
KB668221	2342848	2345089	Fwd	AFUN001634-RA	1_of_2	5'_and_3'
KB668221	2346242	2348088	Fwd	AFUN001634-RA	2_of_2	5'_and_3'
KB668221	2352859	2352926	Fwd	AFUN001635-RA	1_of_1
KB668221	2355485	2355638	Fwd	AFUN014198-RA	1_of_2	5'_and_3'
KB668221	2355739	2355890	Fwd	AFUN014198-RA	2_of_2	5'_and_3'
KB668221	2357047	2357724	Fwd	AFUN001636-RA	1_of_2	5'_and_3'
KB668221	2358325	2358396	Fwd	AFUN001636-RA	2_of_2	5'_and_3'
KB668221	2360011	2360081	Fwd	AFUN001637-RA	1_of_2
KB668221	2360363	2360679	Fwd	AFUN001637-RA	2_of_2	5'_and_3'
KB668221	2378943	2379130	Fwd	AFUN001638-RA	1_of_1
KB668221	2384951	2388968	Fwd	AFUN001639-RA	1_of_9
KB668221	2389222	2393357	Fwd	AFUN001639-RA	2_of_9
KB668221	2393519	2393706	Fwd	AFUN001639-RA	3_of_9
KB668221	2393882	2398686	Fwd	AFUN001639-RA	4_of_9	5'_and_3'
KB668221	2398888	2398988	Fwd	AFUN001639-RA	5_of_9	5'_and_3'
KB668221	2399140	2399635	Fwd	AFUN001639-RA	6_of_9
KB668221	2399833	2399942	Fwd	AFUN001639-RA	7_of_9	5'_and_3'
KB668221	2400029	2400200	Fwd	AFUN001639-RA	8_of_9
KB668221	2400267	2400427	Fwd	AFUN001639-RA	9_of_9	5'_and_3'
KB668221	2402538	2402608	Rev	AFUN001640-RA	12_of_12
KB668221	2402805	2402865	Rev	AFUN001640-RA	11_of_12
KB668221	2403065	2403126	Rev	AFUN001640-RA	10_of_12
KB668221	2403450	2403510	Rev	AFUN001640-RA	9_of_12
KB668221	2403748	2403808	Rev	AFUN001640-RA	8_of_12
KB668221	2404298	2404359	Rev	AFUN001640-RA	7_of_12
KB668221	2404760	2404842	Rev	AFUN001640-RA	6_of_12
KB668221	2405001	2405066	Rev	AFUN001640-RA	5_of_12
KB668221	2405661	2405726	Rev	AFUN001640-RA	4_of_12
KB668221	2407389	2407469	Rev	AFUN001640-RA	3_of_12
KB668221	2407670	2407743	Rev	AFUN001640-RA	2_of_12
KB668221	2407880	2407956	Rev	AFUN001640-RA	1_of_12
KB668221	2420744	2420826	Rev	AFUN001641-RA	8_of_8	5'_and_3'
KB668221	2421018	2421094	Rev	AFUN001641-RA	7_of_8	5'_and_3'
KB668221	2421392	2421567	Rev	AFUN001641-RA	6_of_8	5'_and_3'
KB668221	2422206	2422379	Rev	AFUN001641-RA	5_of_8	5'_and_3'
KB668221	2422513	2423638	Rev	AFUN001641-RA	4_of_8	5'_and_3'
KB668221	2423700	2423993	Rev	AFUN001641-RA	3_of_8	5'_and_3'
KB668221	2424154	2424264	Rev	AFUN001641-RA	2_of_8	5'_and_3'
KB668221	2424581	2424758	Rev	AFUN001641-RA	1_of_8	5'_and_3'
KB668221	2427252	2427318	Fwd	AFUN001642-RA	1_of_4	5'_and_3'
KB668221	2427555	2427622	Fwd	AFUN001642-RA	2_of_4	5'_and_3'
KB668221	2427773	2427828	Fwd	AFUN001642-RA	3_of_4	5'_and_3'
KB668221	2427882	2427947	Fwd	AFUN001642-RA	4_of_4
KB668221	2429878	2430102	Fwd	AFUN001643-RA	1_of_14	3'_only
KB668221	2430259	2430336	Fwd	AFUN001643-RA	2_of_14	5'_and_3'
KB668221	2430631	2430709	Fwd	AFUN001643-RA	3_of_14	5'_and_3'
KB668221	2430917	2431380	Fwd	AFUN001643-RA	4_of_14	5'_and_3'
KB668221	2431464	2431547	Fwd	AFUN001643-RA	5_of_14	5'_and_3'
KB668221	2433002	2433084	Fwd	AFUN001643-RA	6_of_14	5'_and_3'
KB668221	2433257	2433339	Fwd	AFUN001643-RA	7_of_14	5'_and_3'
KB668221	2433430	2435065	Fwd	AFUN001643-RA	8_of_14
KB668221	2435149	2435929	Fwd	AFUN001643-RA	9_of_14	5'_only
KB668221	2436073	2436140	Fwd	AFUN001643-RA	10_of_14	5'_and_3'
KB668221	2436666	2436810	Fwd	AFUN001643-RA	11_of_14	5'_and_3'
KB668221	2438188	2438258	Fwd	AFUN001643-RA	12_of_14	5'_and_3'
KB668221	2438464	2438547	Fwd	AFUN001643-RA	13_of_14	5'_and_3'
KB668221	2438720	2438796	Fwd	AFUN001643-RA	14_of_14	5'_and_3'
KB668221	2440292	2440367	Rev	AFUN001644-RA	4_of_4	5'_and_3'
KB668221	2440541	2440626	Rev	AFUN001644-RA	3_of_4	5'_and_3'
KB668221	2440841	2440923	Rev	AFUN001644-RA	2_of_4	5'_and_3'
KB668221	2441069	2441159	Rev	AFUN001644-RA	1_of_4	5'_and_3'
KB668221	2442513	2442615	Rev	AFUN001645-RA	4_of_4	5'_and_3'
KB668221	2442768	2442841	Rev	AFUN001645-RA	3_of_4	5'_and_3'
KB668221	2442961	2443033	Rev	AFUN001645-RA	2_of_4	5'_and_3'
KB668221	2443368	2444425	Rev	AFUN001645-RA	1_of_4	5'_and_3'
KB668221	2448038	2448959	Rev	AFUN001647-RA	5_of_5	5'_and_3'
KB668221	2451671	2452083	Rev	AFUN001647-RA	4_of_5	5'_and_3'
KB668221	2452315	2452393	Rev	AFUN001647-RA	3_of_5	5'_and_3'
KB668221	2452708	2454331	Rev	AFUN001647-RA	2_of_5	5'_and_3'
KB668221	2454613	2458014	Rev	AFUN001647-RA	1_of_5	5'_and_3'
KB668221	2471136	2471157	Fwd	AFUN014199-RA	1_of_1
KB668221	2476523	2476592	Rev	AFUN001648-RA	7_of_7	5'_and_3'
KB668221	2476700	2476766	Rev	AFUN001648-RA	6_of_7	5'_and_3'
KB668221	2476966	2477028	Rev	AFUN001648-RA	5_of_7	5'_and_3'
KB668221	2477379	2477576	Rev	AFUN001648-RA	4_of_7
KB668221	2477595	2478209	Rev	AFUN001648-RA	3_of_7
KB668221	2479388	2479749	Rev	AFUN001648-RA	2_of_7
KB668221	2480129	2483497	Rev	AFUN001648-RA	1_of_7
KB668221	2492109	2493004	Rev	AFUN014200-RA	1_of_1
KB668221	2512342	2512428	Rev	AFUN001649-RA	6_of_6	5'_and_3'
KB668221	2512536	2512640	Rev	AFUN001649-RA	5_of_6	5'_and_3'
KB668221	2512813	2513793	Rev	AFUN001649-RA	4_of_6	5'_and_3'
KB668221	2513972	2514631	Rev	AFUN001649-RA	3_of_6	5'_and_3'
KB668221	2514890	2515589	Rev	AFUN001649-RA	2_of_6	5'_and_3'
KB668221	2515675	2515766	Rev	AFUN001649-RA	1_of_6	5'_and_3'
KB668221	2542604	2543036	Rev	AFUN001650-RA	2_of_2	5'_only
KB668221	2543261	2543363	Rev	AFUN001650-RA	1_of_2	3'_only
KB668221	2568753	2569139	Fwd	AFUN001652-RA	1_of_3	5'_and_3'
KB668221	2569256	2569387	Fwd	AFUN001652-RA	2_of_3	5'_and_3'
KB668221	2569621	2569684	Fwd	AFUN001652-RA	3_of_3	5'_and_3'
KB668221	2576025	2577603	Rev	AFUN001654-RA	7_of_7	3'_only
KB668221	2577798	2577896	Rev	AFUN001654-RA	6_of_7	5'_and_3'
KB668221	2578083	2578151	Rev	AFUN001654-RA	5_of_7	5'_and_3'
KB668221	2578358	2578447	Rev	AFUN001654-RA	4_of_7	5'_and_3'
KB668221	2578623	2580204	Rev	AFUN001654-RA	3_of_7	5'_and_3'
KB668221	2580249	2580408	Rev	AFUN001654-RA	2_of_7	5'_and_3'
KB668221	2581946	2582107	Rev	AFUN001654-RA	1_of_7
KB668221	2586112	2586211	Fwd	AFUN014201-RA	1_of_1
KB668221	2594134	2594446	Rev	AFUN001655-RA	4_of_4	5'_and_3'
KB668221	2594534	2594634	Rev	AFUN001655-RA	3_of_4	5'_and_3'
KB668221	2594944	2595066	Rev	AFUN001655-RA	2_of_4	5'_and_3'
KB668221	2595098	2595465	Rev	AFUN001655-RA	1_of_4	5'_and_3'
KB668221	2599469	2599530	Fwd	AFUN001656-RA	1_of_1
KB668221	2601829	2604230	Fwd	AFUN001657-RA	1_of_32	5'_and_3'
KB668221	2604403	2608020	Fwd	AFUN001657-RA	2_of_32
KB668221	2608042	2608114	Fwd	AFUN001657-RA	3_of_32
KB668221	2608261	2608351	Fwd	AFUN001657-RA	4_of_32	5'_and_3'
KB668221	2608506	2608573	Fwd	AFUN001657-RA	5_of_32	5'_and_3'
KB668221	2608785	2608861	Fwd	AFUN001657-RA	6_of_32	5'_and_3'
KB668221	2609227	2609294	Fwd	AFUN001657-RA	7_of_32	5'_and_3'
KB668221	2609486	2609552	Fwd	AFUN001657-RA	8_of_32	5'_and_3'
KB668221	2609953	2610016	Fwd	AFUN001657-RA	9_of_32	5'_and_3'
KB668221	2610130	2610893	Fwd	AFUN001657-RA	10_of_32	5'_and_3'
KB668221	2610997	2612768	Fwd	AFUN001657-RA	11_of_32	3'_only
KB668221	2613220	2613294	Fwd	AFUN001657-RA	12_of_32	5'_and_3'
KB668221	2613493	2614249	Fwd	AFUN001657-RA	13_of_32	5'_and_3'
KB668221	2614596	2614674	Fwd	AFUN001657-RA	14_of_32	5'_and_3'
KB668221	2614772	2614858	Fwd	AFUN001657-RA	15_of_32	5'_and_3'
KB668221	2615283	2615356	Fwd	AFUN001657-RA	16_of_32	5'_and_3'
KB668221	2615548	2615617	Fwd	AFUN001657-RA	17_of_32
KB668221	2615831	2615903	Fwd	AFUN001657-RA	18_of_32	5'_and_3'
KB668221	2616049	2616109	Fwd	AFUN001657-RA	19_of_32	5'_and_3'
KB668221	2616276	2616345	Fwd	AFUN001657-RA	20_of_32	5'_and_3'
KB668221	2616540	2616607	Fwd	AFUN001657-RA	21_of_32	5'_and_3'
KB668221	2616752	2616822	Fwd	AFUN001657-RA	22_of_32	5'_and_3'
KB668221	2616944	2617014	Fwd	AFUN001657-RA	23_of_32	5'_and_3'
KB668221	2617094	2618691	Fwd	AFUN001657-RA	24_of_32	3'_only
KB668221	2618862	2618930	Fwd	AFUN001657-RA	25_of_32	5'_and_3'
KB668221	2619499	2619569	Fwd	AFUN001657-RA	26_of_32	5'_and_3'
KB668221	2620131	2620189	Fwd	AFUN001657-RA	27_of_32	5'_and_3'
KB668221	2620356	2620415	Fwd	AFUN001657-RA	28_of_32	5'_and_3'
KB668221	2621501	2621574	Fwd	AFUN001657-RA	29_of_32	5'_and_3'
KB668221	2621724	2621800	Fwd	AFUN001657-RA	30_of_32	5'_and_3'
KB668221	2623119	2623188	Fwd	AFUN001657-RA	31_of_32	5'_and_3'
KB668221	2623358	2623420	Fwd	AFUN001657-RA	32_of_32	5'_and_3'
KB668221	2627751	2627829	Rev	AFUN001658-RA	3_of_3	5'_and_3'
KB668221	2628017	2628145	Rev	AFUN001658-RA	2_of_3	5'_and_3'
KB668221	2628577	2628649	Rev	AFUN001658-RA	1_of_3	5'_and_3'
KB668221	2629604	2629683	Fwd	AFUN001659-RA	1_of_1	5'_and_3'
KB668221	2631122	2631191	Rev	AFUN001660-RA	1_of_1
KB668221	2632911	2632985	Fwd	AFUN001661-RA	1_of_2	5'_and_3'
KB668221	2633165	2633236	Fwd	AFUN001661-RA	2_of_2	3'_only
KB668221	2648464	2649708	Fwd	AFUN001662-RA	1_of_2	5'_and_3'
KB668221	2649890	2650010	Fwd	AFUN001662-RA	2_of_2	5'_and_3'
KB668221	2652222	2652294	Rev	AFUN001663-RA	5_of_5	5'_and_3'
KB668221	2652421	2652497	Rev	AFUN001663-RA	4_of_5	5'_and_3'
KB668221	2652588	2652650	Rev	AFUN001663-RA	3_of_5	5'_and_3'
KB668221	2653529	2653592	Rev	AFUN001663-RA	2_of_5	5'_and_3'
KB668221	2654005	2658574	Rev	AFUN001663-RA	1_of_5	5'_and_3'
KB668221	2707810	2709109	Rev	AFUN001665-RA	1_of_1
KB668221	2714452	2715278	Fwd	AFUN001666-RA	1_of_6
KB668221	2715416	2715485	Fwd	AFUN001666-RA	2_of_6
KB668221	2715814	2717904	Fwd	AFUN001666-RA	3_of_6
KB668221	2718252	2718326	Fwd	AFUN001666-RA	4_of_6
KB668221	2718506	2718620	Fwd	AFUN001666-RA	5_of_6
KB668221	2718757	2718838	Fwd	AFUN001666-RA	6_of_6
KB668221	2719734	2719813	Rev	AFUN001667-RA	4_of_4	5'_and_3'
KB668221	2719884	2719959	Rev	AFUN001667-RA	3_of_4	5'_and_3'
KB668221	2721008	2721070	Rev	AFUN001667-RA	2_of_4	5'_and_3'
KB668221	2721265	2721334	Rev	AFUN001667-RA	1_of_4	5'_and_3'
KB668221	2722676	2722816	Fwd	AFUN001668-RA	1_of_2	5'_and_3'
KB668221	2722978	2723182	Fwd	AFUN001668-RA	2_of_2	5'_and_3'
KB668221	2725599	2725675	Rev	AFUN001669-RA	5_of_5	5'_and_3'
KB668221	2725772	2725893	Rev	AFUN001669-RA	4_of_5	5'_and_3'
KB668221	2726221	2726312	Rev	AFUN001669-RA	3_of_5	5'_and_3'
KB668221	2726543	2728958	Rev	AFUN001669-RA	2_of_5
KB668221	2727560	2727630	Fwd	AFUN001670-RA	1_of_1	5'_and_3'
KB668221	2730504	2730569	Rev	AFUN001669-RA	1_of_5	5'_and_3'
KB668221	2731791	2731880	Fwd	AFUN001671-RA	1_of_1	5'_and_3'
KB668221	2745794	2748980	Fwd	AFUN001673-RA	1_of_9	5'_and_3'
KB668221	2749278	2749339	Fwd	AFUN001673-RA	2_of_9	5'_and_3'
KB668221	2749560	2749665	Fwd	AFUN001673-RA	3_of_9	5'_and_3'
KB668221	2750034	2751624	Fwd	AFUN001673-RA	4_of_9	5'_and_3'
KB668221	2751860	2751943	Fwd	AFUN001673-RA	5_of_9	5'_and_3'
KB668221	2752309	2752376	Fwd	AFUN001673-RA	6_of_9	5'_and_3'
KB668221	2752466	2752575	Fwd	AFUN001673-RA	7_of_9	5'_and_3'
KB668221	2752753	2752836	Fwd	AFUN001673-RA	8_of_9	5'_and_3'
KB668221	2752924	2752992	Fwd	AFUN001673-RA	9_of_9	5'_and_3'
KB668221	2755902	2755964	Rev	AFUN001674-RA	24_of_24	5'_and_3'
KB668221	2756909	2756972	Rev	AFUN001674-RA	23_of_24	5'_and_3'
KB668221	2757237	2758955	Rev	AFUN001674-RA	22_of_24
KB668221	2757844	2757907	Fwd	AFUN001675-RA	1_of_2	5'_and_3'
KB668221	2758049	2758134	Fwd	AFUN001675-RA	2_of_2	5'_and_3'
KB668221	2759312	2759379	Rev	AFUN001674-RA	21_of_24	5'_and_3'
KB668221	2759659	2759735	Rev	AFUN001674-RA	20_of_24
KB668221	2760083	2760146	Rev	AFUN001674-RA	19_of_24	5'_and_3'
KB668221	2760252	2760324	Rev	AFUN001674-RA	18_of_24	5'_and_3'
KB668221	2760490	2760561	Rev	AFUN001674-RA	17_of_24	5'_and_3'
KB668221	2760777	2760857	Rev	AFUN001674-RA	16_of_24	5'_and_3'
KB668221	2761016	2761091	Rev	AFUN001674-RA	15_of_24
KB668221	2761188	2762469	Rev	AFUN001674-RA	14_of_24
KB668221	2762988	2763207	Rev	AFUN001674-RA	13_of_24	5'_only
KB668221	2763595	2763667	Rev	AFUN001674-RA	12_of_24	5'_and_3'
KB668221	2763779	2763851	Rev	AFUN001674-RA	11_of_24	5'_and_3'
KB668221	2764017	2764098	Rev	AFUN001674-RA	10_of_24	5'_and_3'
KB668221	2764314	2764550	Rev	AFUN001674-RA	9_of_24
KB668221	2764709	2764826	Rev	AFUN001674-RA	8_of_24
KB668221	2765107	2765742	Rev	AFUN001674-RA	7_of_24
KB668221	2765811	2765875	Rev	AFUN001674-RA	6_of_24
KB668221	2766128	2766203	Rev	AFUN001674-RA	5_of_24	5'_and_3'
KB668221	2766336	2766378	Rev	AFUN001674-RA	4_of_24	3'_only
KB668221	2766685	2766754	Rev	AFUN001674-RA	3_of_24
KB668221	2767448	2767517	Rev	AFUN001674-RA	2_of_24	5'_and_3'
KB668221	2767833	2768520	Rev	AFUN001674-RA	1_of_24	3'_only
KB668221	2779076	2783062	Fwd	AFUN001676-RA	1_of_4	5'_and_3'
KB668221	2783456	2783520	Fwd	AFUN001676-RA	2_of_4	5'_and_3'
KB668221	2784090	2784157	Fwd	AFUN001676-RA	3_of_4	5'_and_3'
KB668221	2784849	2784924	Fwd	AFUN001676-RA	4_of_4	5'_and_3'
KB668221	2786724	2786780	Rev	AFUN001677-RA	2_of_2	5'_and_3'
KB668221	2786853	2786916	Rev	AFUN001677-RA	1_of_2
KB668221	2788135	2788209	Rev	AFUN001678-RA	3_of_3	5'_and_3'
KB668221	2788291	2788354	Rev	AFUN001678-RA	2_of_3	5'_and_3'
KB668221	2788430	2788486	Rev	AFUN001678-RA	1_of_3	5'_and_3'
KB668221	2792765	2793391	Rev	AFUN001679-RA	4_of_4
KB668221	2793917	2794033	Rev	AFUN001679-RA	3_of_4
KB668221	2794251	2797057	Rev	AFUN001679-RA	2_of_4
KB668221	2797243	2798161	Rev	AFUN001679-RA	1_of_4
KB668221	2841928	2841993	Rev	AFUN001680-RA	5_of_5	5'_and_3'
KB668221	2842325	2842397	Rev	AFUN001680-RA	4_of_5	5'_and_3'
KB668221	2842610	2842688	Rev	AFUN001680-RA	3_of_5	5'_and_3'
KB668221	2842857	2843075	Rev	AFUN001680-RA	2_of_5	3'_only
KB668221	2845112	2847429	Rev	AFUN001680-RA	1_of_5	5'_and_3'
KB668221	2852001	2852065	Rev	AFUN001681-RA	3_of_3	5'_and_3'
KB668221	2852365	2852437	Rev	AFUN001681-RA	2_of_3	5'_and_3'
KB668221	2852738	2852834	Rev	AFUN001681-RA	1_of_3
KB668221	2878921	2880351	Fwd	AFUN001682-RA	1_of_6	5'_and_3'
KB668221	2880718	2880784	Fwd	AFUN001682-RA	2_of_6	5'_and_3'
KB668221	2882003	2882064	Fwd	AFUN001682-RA	3_of_6
KB668221	2882209	2882284	Fwd	AFUN001682-RA	4_of_6
KB668221	2882545	2882613	Fwd	AFUN001682-RA	5_of_6	5'_and_3'
KB668221	2882895	2882960	Fwd	AFUN001682-RA	6_of_6	5'_and_3'
KB668221	2895464	2895533	Fwd	AFUN001683-RA	1_of_7	5'_and_3'
KB668221	2895648	2896873	Fwd	AFUN001683-RA	2_of_7
KB668221	2897357	2897434	Fwd	AFUN001683-RA	3_of_7
KB668221	2897557	2899727	Fwd	AFUN001683-RA	4_of_7
KB668221	2899940	2900013	Fwd	AFUN001683-RA	5_of_7	5'_and_3'
KB668221	2900502	2900985	Fwd	AFUN001683-RA	6_of_7
KB668221	2901684	2901752	Fwd	AFUN001683-RA	7_of_7	3'_only
KB668221	2905346	2906682	Fwd	AFUN001684-RA	1_of_4	5'_and_3'
KB668221	2906917	2906986	Fwd	AFUN001684-RA	2_of_4	5'_and_3'
KB668221	2909771	2909839	Fwd	AFUN001684-RA	3_of_4	5'_and_3'
KB668221	2909910	2914420	Fwd	AFUN001684-RA	4_of_4	5'_and_3'
KB668221	2918037	2918054	Rev	AFUN001685-RA	7_of_7
KB668221	2918181	2919684	Rev	AFUN001685-RA	6_of_7	5'_and_3'
KB668221	2919752	2919814	Rev	AFUN001685-RA	5_of_7	5'_and_3'
KB668221	2920096	2920187	Rev	AFUN001685-RA	4_of_7	5'_and_3'
KB668221	2920818	2920891	Rev	AFUN001685-RA	3_of_7	5'_and_3'
KB668221	2921048	2921146	Rev	AFUN001685-RA	2_of_7	5'_and_3'
KB668221	2921297	2921364	Rev	AFUN001685-RA	1_of_7	5'_and_3'
KB668221	2921779	2926159	Rev	AFUN001686-RA	1_of_1	3'_only
KB668221	2958853	2958913	Rev	AFUN001687-RA	1_of_1
KB668221	2971213	2971273	Rev	AFUN001688-RA	2_of_2
KB668221	2972173	2972237	Rev	AFUN001688-RA	1_of_2
KB668221	2978274	2978339	Rev	AFUN001689-RA	1_of_1
KB668221	3037662	3037730	Rev	AFUN001690-RA	1_of_1	5'_and_3'
KB668221	3093324	3093695	Fwd	AFUN001691-RA	1_of_2
KB668221	3094111	3096810	Fwd	AFUN001691-RA	2_of_2	5'_only
KB668221	3100035	3100774	Fwd	AFUN001692-RA	1_of_2
KB668221	3101244	3101395	Fwd	AFUN001692-RA	2_of_2
KB668221	3114673	3115203	Fwd	AFUN001693-RA	1_of_3
KB668221	3115323	3115405	Fwd	AFUN001693-RA	2_of_3
KB668221	3115627	3116050	Fwd	AFUN001693-RA	3_of_3	5'_only
KB668221	3129020	3129419	Fwd	AFUN001694-RA	1_of_2	5'_and_3'
KB668221	3132474	3132820	Fwd	AFUN001694-RA	2_of_2	5'_and_3'
KB668221	3147706	3147744	Rev	AFUN001695-RA	6_of_6
KB668221	3148523	3150093	Rev	AFUN001695-RA	5_of_6	5'_only
KB668221	3150255	3150331	Rev	AFUN001695-RA	4_of_6	5'_and_3'
KB668221	3151148	3151757	Rev	AFUN001695-RA	3_of_6	5'_and_3'
KB668221	3152585	3152656	Rev	AFUN001695-RA	2_of_6	5'_and_3'
KB668221	3152968	3153037	Rev	AFUN001695-RA	1_of_6	5'_and_3'
KB668221	3225422	3225490	Fwd	AFUN001696-RA	1_of_4	5'_and_3'
KB668221	3225695	3225888	Fwd	AFUN001696-RA	2_of_4	5'_and_3'
KB668221	3226067	3226163	Fwd	AFUN001696-RA	3_of_4	5'_and_3'
KB668221	3226377	3226448	Fwd	AFUN001696-RA	4_of_4	5'_and_3'
KB668221	3234606	3234670	Rev	AFUN001697-RA	10_of_10	5'_and_3'
KB668221	3234989	3235072	Rev	AFUN001697-RA	9_of_10	5'_and_3'
KB668221	3235618	3235686	Rev	AFUN001697-RA	8_of_10	5'_and_3'
KB668221	3235867	3235950	Rev	AFUN001697-RA	7_of_10	5'_and_3'
KB668221	3236129	3236193	Rev	AFUN001697-RA	6_of_10	5'_and_3'
KB668221	3236719	3236795	Rev	AFUN001697-RA	5_of_10	5'_and_3'
KB668221	3237646	3238433	Rev	AFUN001697-RA	4_of_10	5'_and_3'
KB668221	3238707	3238886	Rev	AFUN001697-RA	3_of_10	5'_and_3'
KB668221	3239879	3240731	Rev	AFUN001697-RA	2_of_10	3'_only
KB668221	3240755	3240800	Rev	AFUN001697-RA	1_of_10
KB668221	3287803	3287890	Fwd	AFUN014202-RA	1_of_1
KB668221	3312774	3312837	Rev	AFUN001699-RA	5_of_5	5'_and_3'
KB668221	3312940	3313165	Rev	AFUN001699-RA	4_of_5	5'_and_3'
KB668221	3313431	3313503	Rev	AFUN001699-RA	3_of_5	5'_and_3'
KB668221	3313703	3313844	Rev	AFUN001699-RA	2_of_5	5'_and_3'
KB668221	3315143	3316693	Rev	AFUN001699-RA	1_of_5	5'_and_3'
KB668221	3318438	3318501	Fwd	AFUN001700-RA	1_of_17	5'_and_3'
KB668221	3319617	3320188	Fwd	AFUN001700-RA	2_of_17
KB668221	3320536	3321040	Fwd	AFUN001700-RA	3_of_17	5'_and_3'
KB668221	3321355	3322131	Fwd	AFUN001700-RA	4_of_17	5'_and_3'
KB668221	3322382	3322446	Fwd	AFUN001700-RA	5_of_17	5'_and_3'
KB668221	3322624	3322705	Fwd	AFUN001700-RA	6_of_17	5'_and_3'
KB668221	3323411	3323483	Fwd	AFUN001700-RA	7_of_17	5'_and_3'
KB668221	3324220	3324301	Fwd	AFUN001700-RA	8_of_17	5'_and_3'
KB668221	3324626	3324706	Fwd	AFUN001700-RA	9_of_17	5'_and_3'
KB668221	3324771	3326317	Fwd	AFUN001700-RA	10_of_17
KB668221	3326382	3327297	Fwd	AFUN001700-RA	11_of_17	5'_and_3'
KB668221	3327492	3327566	Fwd	AFUN001700-RA	12_of_17	5'_and_3'
KB668221	3328756	3328826	Fwd	AFUN001700-RA	13_of_17	5'_and_3'
KB668221	3329221	3329279	Fwd	AFUN001700-RA	14_of_17	5'_and_3'
KB668221	3329500	3329588	Fwd	AFUN001700-RA	15_of_17	5'_and_3'
KB668221	3329818	3329883	Fwd	AFUN001700-RA	16_of_17	5'_and_3'
KB668221	3330858	3331260	Fwd	AFUN001700-RA	17_of_17	5'_only
KB668221	3331862	3331924	Rev	AFUN001701-RA	2_of_2
KB668221	3332901	3332960	Rev	AFUN001701-RA	1_of_2
KB668221	3333238	3333425	Fwd	AFUN001702-RA	1_of_3	3'_only
KB668221	3333738	3333814	Fwd	AFUN001702-RA	2_of_3	5'_and_3'
KB668221	3334056	3334130	Fwd	AFUN001702-RA	3_of_3	5'_and_3'
KB668221	3336236	3336259	Rev	AFUN001703-RA	8_of_8
KB668221	3337016	3337262	Rev	AFUN001703-RA	7_of_8	5'_and_3'
KB668221	3340011	3340120	Rev	AFUN001703-RA	6_of_8	5'_and_3'
KB668221	3340395	3340464	Rev	AFUN001703-RA	5_of_8	5'_and_3'
KB668221	3340636	3340701	Rev	AFUN001703-RA	4_of_8	5'_and_3'
KB668221	3344346	3347493	Rev	AFUN001703-RA	3_of_8
KB668221	3347524	3347620	Rev	AFUN001703-RA	2_of_8	5'_and_3'
KB668221	3347680	3347896	Rev	AFUN001703-RA	1_of_8	5'_and_3'
KB668221	3349244	3351295	Fwd	AFUN001704-RA	1_of_7	5'_and_3'
KB668221	3352053	3353776	Fwd	AFUN001704-RA	2_of_7	5'_and_3'
KB668221	3353935	3354016	Fwd	AFUN001704-RA	3_of_7	5'_and_3'
KB668221	3354109	3354185	Fwd	AFUN001704-RA	4_of_7	5'_and_3'
KB668221	3354386	3354685	Fwd	AFUN001704-RA	5_of_7	5'_and_3'
KB668221	3354885	3354943	Fwd	AFUN001704-RA	6_of_7	5'_and_3'
KB668221	3355512	3355581	Fwd	AFUN001704-RA	7_of_7	5'_and_3'
KB668221	3359515	3362850	Fwd	AFUN001706-RA	1_of_17	5'_and_3'
KB668221	3363533	3367904	Fwd	AFUN001706-RA	2_of_17	5'_and_3'
KB668221	3368250	3368319	Fwd	AFUN001706-RA	3_of_17	5'_and_3'
KB668221	3368536	3368635	Fwd	AFUN001706-RA	4_of_17	5'_and_3'
KB668221	3368735	3368810	Fwd	AFUN001706-RA	5_of_17	5'_and_3'
KB668221	3368908	3369946	Fwd	AFUN001706-RA	6_of_17	5'_and_3'
KB668221	3370739	3372529	Fwd	AFUN001706-RA	7_of_17	5'_and_3'
KB668221	3372821	3374989	Fwd	AFUN001706-RA	8_of_17
KB668221	3375099	3375170	Fwd	AFUN001706-RA	9_of_17	5'_and_3'
KB668221	3375344	3375429	Fwd	AFUN001706-RA	10_of_17	5'_and_3'
KB668221	3375603	3376513	Fwd	AFUN001706-RA	11_of_17	5'_only
KB668221	3376573	3376830	Fwd	AFUN001706-RA	12_of_17
KB668221	3376921	3376989	Fwd	AFUN001706-RA	13_of_17	5'_and_3'
KB668221	3377166	3377233	Fwd	AFUN001706-RA	14_of_17	5'_and_3'
KB668221	3377418	3377502	Fwd	AFUN001706-RA	15_of_17	5'_and_3'
KB668221	3378013	3378091	Fwd	AFUN001706-RA	16_of_17	5'_and_3'
KB668221	3378322	3378387	Fwd	AFUN001706-RA	17_of_17	5'_and_3'
KB668221	3382772	3382836	Rev	AFUN001708-RA	2_of_2	5'_and_3'
KB668221	3383215	3383322	Rev	AFUN001708-RA	1_of_2	5'_and_3'
KB668221	3399653	3399858	Rev	AFUN001709-RA	2_of_2
KB668221	3400111	3400170	Rev	AFUN001709-RA	1_of_2
KB668221	3404040	3404109	Rev	AFUN001710-RA	1_of_1	5'_and_3'
KB668221	3411444	3411637	Fwd	AFUN001711-RA	1_of_5	5'_and_3'
KB668221	3411862	3411927	Fwd	AFUN001711-RA	2_of_5	5'_and_3'
KB668221	3412140	3412904	Fwd	AFUN001711-RA	3_of_5
KB668221	3412924	3413031	Fwd	AFUN001711-RA	4_of_5	3'_only
KB668221	3413129	3413202	Fwd	AFUN001711-RA	5_of_5	5'_and_3'
KB668221	3446894	3446971	Rev	AFUN001712-RA	2_of_2
KB668221	3447260	3447357	Rev	AFUN001712-RA	1_of_2	3'_only
KB668221	3450109	3450482	Fwd	AFUN001713-RA	1_of_2
KB668221	3453721	3454209	Fwd	AFUN001713-RA	2_of_2	5'_and_3'
KB668221	3457650	3457722	Fwd	AFUN001715-RA	1_of_1	5'_and_3'
KB668221	3459545	3459746	Rev	AFUN001716-RA	2_of_2	5'_and_3'
KB668221	3460168	3460249	Rev	AFUN001716-RA	1_of_2	5'_and_3'
KB668221	3465490	3466535	Rev	AFUN001717-RA	9_of_9	5'_and_3'
KB668221	3466735	3467403	Rev	AFUN001717-RA	8_of_9	3'_only
KB668221	3467436	3467751	Rev	AFUN001717-RA	7_of_9	5'_only
KB668221	3467954	3468156	Rev	AFUN001717-RA	6_of_9	5'_and_3'
KB668221	3468398	3468470	Rev	AFUN001717-RA	5_of_9	5'_and_3'
KB668221	3471492	3472684	Rev	AFUN001717-RA	4_of_9	5'_and_3'
KB668221	3476918	3478026	Rev	AFUN001717-RA	3_of_9	5'_and_3'
KB668221	3478537	3478598	Rev	AFUN001717-RA	2_of_9	5'_and_3'
KB668221	3480227	3480440	Rev	AFUN001717-RA	1_of_9	5'_and_3'
KB668221	3481837	3481898	Fwd	AFUN001718-RA	1_of_3	5'_and_3'
KB668221	3483712	3483780	Fwd	AFUN001718-RA	2_of_3	5'_and_3'
KB668221	3484269	3484334	Fwd	AFUN001718-RA	3_of_3	5'_and_3'
KB668221	3496096	3496194	Rev	AFUN001720-RA	2_of_2	5'_and_3'
KB668221	3496825	3496893	Rev	AFUN001720-RA	1_of_2	3'_only
KB668221	3516430	3516899	Rev	AFUN001723-RA	4_of_4	5'_and_3'
KB668221	3516994	3517061	Rev	AFUN001723-RA	3_of_4	5'_and_3'
KB668221	3517284	3517851	Rev	AFUN001723-RA	2_of_4	5'_and_3'
KB668221	3518640	3518728	Rev	AFUN001723-RA	1_of_4	5'_and_3'
KB668221	3520612	3520681	Rev	AFUN001724-RA	19_of_19	5'_and_3'
KB668221	3520766	3521327	Rev	AFUN001724-RA	18_of_19	5'_and_3'
KB668221	3521374	3521907	Rev	AFUN001724-RA	17_of_19
KB668221	3522169	3522540	Rev	AFUN001724-RA	16_of_19
KB668221	3523165	3523228	Rev	AFUN001724-RA	15_of_19
KB668221	3523569	3523645	Rev	AFUN001724-RA	14_of_19
KB668221	3526178	3526243	Rev	AFUN001724-RA	13_of_19
KB668221	3526374	3526436	Rev	AFUN001724-RA	12_of_19
KB668221	3529174	3529244	Rev	AFUN001724-RA	11_of_19
KB668221	3529450	3529520	Rev	AFUN001724-RA	10_of_19
KB668221	3530075	3530136	Rev	AFUN001724-RA	9_of_19
KB668221	3531427	3531491	Rev	AFUN001724-RA	8_of_19
KB668221	3532713	3532780	Rev	AFUN001724-RA	7_of_19
KB668221	3533047	3533130	Rev	AFUN001724-RA	6_of_19
KB668221	3533316	3533383	Rev	AFUN001724-RA	5_of_19
KB668221	3534346	3534410	Rev	AFUN001724-RA	4_of_19
KB668221	3535135	3535195	Rev	AFUN001724-RA	3_of_19
KB668221	3535294	3535364	Rev	AFUN001724-RA	2_of_19
KB668221	3535919	3535989	Rev	AFUN001724-RA	1_of_19
KB668221	3582032	3582258	Rev	AFUN001725-RA	2_of_2
KB668221	3583165	3583242	Rev	AFUN001725-RA	1_of_2	5'_and_3'
KB668221	3669496	3671062	Rev	AFUN001726-RA	2_of_2	5'_and_3'
KB668221	3671280	3671369	Rev	AFUN001726-RA	1_of_2	5'_and_3'
KB668222	39037	39587	Rev	AFUN010557-RA	3_of_3	5'_and_3'
KB668222	39938	40040	Rev	AFUN010557-RA	2_of_3	5'_and_3'
KB668222	40183	41358	Rev	AFUN010557-RA	1_of_3	5'_and_3'
KB668222	108585	108657	Rev	AFUN010560-RA	2_of_2	5'_and_3'
KB668222	108813	108883	Rev	AFUN010560-RA	1_of_2	5'_and_3'
KB668222	127161	127214	Rev	AFUN010561-RA	1_of_1	5'_only
KB668222	129897	130021	Fwd	AFUN010562-RA	1_of_1	5'_only
KB668222	131287	131349	Rev	AFUN010563-RA	1_of_1	5'_and_3'
KB668222	132679	136054	Rev	AFUN010564-RA	4_of_4	5'_and_3'
KB668222	136151	136276	Rev	AFUN010564-RA	3_of_4	5'_and_3'
KB668222	136498	136800	Rev	AFUN010564-RA	2_of_4	5'_and_3'
KB668222	137035	137218	Rev	AFUN010564-RA	1_of_4	5'_and_3'
KB668222	180721	181303	Fwd	AFUN010565-RA	1_of_2
KB668222	181510	181581	Fwd	AFUN010565-RA	2_of_2
KB668222	213395	213641	Fwd	AFUN010567-RA	1_of_2	5'_only
KB668222	213654	217390	Fwd	AFUN010567-RA	2_of_2	3'_only
KB668222	285655	285744	Rev	AFUN010568-RA	4_of_4	5'_and_3'
KB668222	286276	286411	Rev	AFUN010568-RA	3_of_4
KB668222	286543	286651	Rev	AFUN010568-RA	2_of_4
KB668222	286834	288162	Rev	AFUN010568-RA	1_of_4	5'_and_3'
KB668222	304242	305291	Fwd	AFUN010569-RA	1_of_4
KB668222	305603	305662	Fwd	AFUN010569-RA	2_of_4
KB668222	306176	306234	Fwd	AFUN010569-RA	3_of_4
KB668222	306418	306492	Fwd	AFUN010569-RA	4_of_4
KB668222	339030	339394	Rev	AFUN010570-RA	1_of_1	3'_only
KB668222	347027	350812	Rev	AFUN010571-RA	1_of_1	5'_and_3'
KB668222	377940	378021	Rev	AFUN010572-RA	2_of_2	5'_and_3'
KB668222	378213	378326	Rev	AFUN010572-RA	1_of_2
KB668222	390259	390330	Rev	AFUN010573-RA	3_of_3
KB668222	390499	390561	Rev	AFUN010573-RA	2_of_3	5'_and_3'
KB668222	391102	391169	Rev	AFUN010573-RA	1_of_3
KB668222	394867	395610	Rev	AFUN010574-RA	11_of_11
KB668222	395744	397048	Rev	AFUN010574-RA	10_of_11	5'_and_3'
KB668222	397178	398659	Rev	AFUN010574-RA	9_of_11	3'_only
KB668222	398872	400499	Rev	AFUN010574-RA	8_of_11
KB668222	400605	401577	Rev	AFUN010574-RA	7_of_11	5'_only
KB668222	402272	402423	Rev	AFUN010574-RA	6_of_11	5'_and_3'
KB668222	402631	402702	Rev	AFUN010574-RA	5_of_11	5'_and_3'
KB668222	403240	403382	Rev	AFUN010574-RA	4_of_11	5'_and_3'
KB668222	404811	404883	Rev	AFUN010574-RA	3_of_11
KB668222	405187	405266	Rev	AFUN010574-RA	2_of_11	5'_and_3'
KB668222	405563	405641	Rev	AFUN010574-RA	1_of_11	5'_and_3'
KB668222	466229	467396	Fwd	AFUN010576-RA	1_of_5	5'_and_3'
KB668222	467611	467823	Fwd	AFUN010576-RA	2_of_5	5'_and_3'
KB668222	467953	470377	Fwd	AFUN010576-RA	3_of_5	5'_and_3'
KB668222	468424	468503	Rev	AFUN010577-RA	4_of_4
KB668222	468701	468776	Rev	AFUN010577-RA	3_of_4
KB668222	469210	469280	Rev	AFUN010577-RA	2_of_4
KB668222	469716	469789	Rev	AFUN010577-RA	1_of_4
KB668222	470599	470660	Fwd	AFUN010576-RA	4_of_5	5'_and_3'
KB668222	471024	471093	Fwd	AFUN010576-RA	5_of_5	5'_and_3'
KB668222	476016	476097	Rev	AFUN010578-RA	3_of_3	5'_and_3'
KB668222	476852	476917	Rev	AFUN010578-RA	2_of_3	5'_and_3'
KB668222	477102	478008	Rev	AFUN010578-RA	1_of_3	3'_only
KB668222	553234	553428	Rev	AFUN010579-RA	1_of_1	3'_only
KB668222	565522	565907	Rev	AFUN015148-RA	1_of_1
KB668222	601730	601749	Fwd	AFUN015149-RA	1_of_1
KB668222	607460	607538	Rev	AFUN010580-RA	1_of_1	5'_and_3'
KB668222	633543	633612	Fwd	AFUN010581-RA	1_of_1
KB668222	639137	639209	Rev	AFUN010582-RA	2_of_2	5'_and_3'
KB668222	639516	639580	Rev	AFUN010582-RA	1_of_2	5'_and_3'
KB668222	642993	643059	Fwd	AFUN010583-RA	1_of_1	5'_and_3'
KB668222	643989	644066	Rev	AFUN010584-RA	12_of_12	5'_and_3'
KB668222	644555	644627	Rev	AFUN010584-RA	11_of_12	5'_and_3'
KB668222	646173	646234	Rev	AFUN010584-RA	10_of_12	5'_and_3'
KB668222	646275	647142	Rev	AFUN010584-RA	9_of_12	5'_only
KB668222	647622	647688	Rev	AFUN010584-RA	8_of_12	5'_and_3'
KB668222	649423	650191	Rev	AFUN010584-RA	7_of_12
KB668222	650906	652130	Rev	AFUN010584-RA	6_of_12
KB668222	652219	652375	Rev	AFUN010584-RA	5_of_12
KB668222	652621	652683	Rev	AFUN010584-RA	4_of_12	5'_and_3'
KB668222	653075	653372	Rev	AFUN010584-RA	3_of_12	5'_and_3'
KB668222	653709	655294	Rev	AFUN010584-RA	2_of_12
KB668222	655645	656176	Rev	AFUN010584-RA	1_of_12
KB668222	683191	683253	Fwd	AFUN010585-RA	1_of_5
KB668222	684356	684448	Fwd	AFUN010585-RA	2_of_5
KB668222	684537	684797	Fwd	AFUN010585-RA	3_of_5
KB668222	685686	685759	Fwd	AFUN010585-RA	4_of_5	5'_and_3'
KB668222	685905	685968	Fwd	AFUN010585-RA	5_of_5
KB668222	737960	738324	Fwd	AFUN015150-RA	1_of_1	5'_only
KB668222	759104	759909	Fwd	AFUN010586-RA	1_of_5	3'_only
KB668222	760083	760265	Fwd	AFUN010586-RA	2_of_5	5'_and_3'
KB668222	760434	760514	Fwd	AFUN010586-RA	3_of_5	5'_and_3'
KB668222	760696	760791	Fwd	AFUN010586-RA	4_of_5	5'_and_3'
KB668222	761142	761244	Fwd	AFUN010586-RA	5_of_5	5'_and_3'
KB668222	764976	765099	Fwd	AFUN010587-RA	1_of_3	5'_and_3'
KB668222	765185	765253	Fwd	AFUN010587-RA	2_of_3	5'_and_3'
KB668222	765512	765588	Fwd	AFUN010587-RA	3_of_3
KB668222	768094	768154	Rev	AFUN010588-RA	1_of_1
KB668222	860419	861591	Fwd	AFUN010589-RA	1_of_10	5'_and_3'
KB668222	861790	864560	Fwd	AFUN010589-RA	2_of_10	5'_and_3'
KB668222	864902	864993	Fwd	AFUN010589-RA	3_of_10	5'_and_3'
KB668222	865157	865272	Fwd	AFUN010589-RA	4_of_10	5'_and_3'
KB668222	865447	865517	Fwd	AFUN010589-RA	5_of_10	5'_and_3'
KB668222	865736	865742	Fwd	AFUN010589-RA	6_of_10
KB668222	865887	866276	Fwd	AFUN010589-RA	7_of_10
KB668222	866632	866744	Fwd	AFUN010589-RA	8_of_10	3'_only
KB668222	866919	866989	Fwd	AFUN010589-RA	9_of_10	5'_and_3'
KB668222	867125	867206	Fwd	AFUN010589-RA	10_of_10
KB668222	877649	886915	Fwd	AFUN010590-RA	1_of_3
KB668222	887126	887994	Fwd	AFUN010590-RA	2_of_3	5'_and_3'
KB668222	888190	889626	Fwd	AFUN010590-RA	3_of_3	5'_and_3'
KB668222	893132	893199	Rev	AFUN010591-RA	2_of_2	5'_and_3'
KB668222	893508	893595	Rev	AFUN010591-RA	1_of_2	5'_and_3'
KB668222	899758	899851	Rev	AFUN010592-RA	3_of_3	5'_and_3'
KB668222	900169	901268	Rev	AFUN010592-RA	2_of_3	5'_and_3'
KB668222	900609	900683	Fwd	AFUN010593-RA	1_of_3	5'_and_3'
KB668222	900794	900865	Fwd	AFUN010593-RA	2_of_3	5'_and_3'
KB668222	901052	901109	Fwd	AFUN010593-RA	3_of_3	5'_and_3'
KB668222	901939	902607	Rev	AFUN010592-RA	1_of_3	5'_and_3'
KB668222	904591	905772	Fwd	AFUN010594-RA	1_of_3
KB668222	906327	909682	Fwd	AFUN010594-RA	2_of_3	5'_only
KB668222	909800	910002	Fwd	AFUN010594-RA	3_of_3
KB668222	964772	964846	Fwd	AFUN010595-RA	1_of_11	5'_and_3'
KB668222	965158	965481	Fwd	AFUN010595-RA	2_of_11	5'_and_3'
KB668222	966368	969592	Fwd	AFUN010595-RA	3_of_11	5'_and_3'
KB668222	970284	970361	Fwd	AFUN010595-RA	4_of_11	5'_and_3'
KB668222	970616	970698	Fwd	AFUN010595-RA	5_of_11	5'_and_3'
KB668222	971038	971372	Fwd	AFUN010595-RA	6_of_11	5'_and_3'
KB668222	974487	974562	Fwd	AFUN010595-RA	7_of_11	5'_and_3'
KB668222	974710	974782	Fwd	AFUN010595-RA	8_of_11	5'_and_3'
KB668222	974994	975067	Fwd	AFUN010595-RA	9_of_11	5'_and_3'
KB668222	975363	975433	Fwd	AFUN010595-RA	10_of_11	5'_and_3'
KB668222	978094	978114	Fwd	AFUN010595-RA	11_of_11
KB668222	980202	981440	Fwd	AFUN010597-RA	1_of_1	3'_only
KB668222	1023027	1024125	Fwd	AFUN010598-RA	1_of_1	5'_and_3'
KB668222	1067997	1068076	Fwd	AFUN010599-RA	1_of_7	5'_and_3'
KB668222	1068558	1068891	Fwd	AFUN010599-RA	2_of_7	5'_and_3'
KB668222	1069151	1069227	Fwd	AFUN010599-RA	3_of_7	5'_and_3'
KB668222	1069350	1069592	Fwd	AFUN010599-RA	4_of_7	5'_and_3'
KB668222	1069668	1070281	Fwd	AFUN010599-RA	5_of_7	5'_and_3'
KB668222	1070541	1070613	Fwd	AFUN010599-RA	6_of_7	5'_and_3'
KB668222	1070715	1070784	Fwd	AFUN010599-RA	7_of_7	5'_and_3'
KB668222	1074008	1074072	Rev	AFUN010600-RA	2_of_2	5'_and_3'
KB668222	1075594	1075678	Rev	AFUN010600-RA	1_of_2	5'_and_3'
KB668222	1079419	1079578	Rev	AFUN010601-RA	11_of_11	5'_and_3'
KB668222	1079789	1080068	Rev	AFUN010601-RA	10_of_11	5'_and_3'
KB668222	1080180	1080253	Rev	AFUN010601-RA	9_of_11	5'_and_3'
KB668222	1080442	1081006	Rev	AFUN010601-RA	8_of_11	5'_only
KB668222	1081081	1081197	Rev	AFUN010601-RA	7_of_11	5'_and_3'
KB668222	1081688	1081844	Rev	AFUN010601-RA	6_of_11	5'_and_3'
KB668222	1081918	1082228	Rev	AFUN010601-RA	5_of_11	5'_only
KB668222	1082435	1082525	Rev	AFUN010601-RA	4_of_11	5'_and_3'
KB668222	1082980	1083069	Rev	AFUN010601-RA	3_of_11	5'_and_3'
KB668222	1083205	1083270	Rev	AFUN010601-RA	2_of_11	5'_and_3'
KB668222	1083369	1084320	Rev	AFUN010601-RA	1_of_11	5'_and_3'
KB668222	1089257	1089636	Rev	AFUN010602-RA	1_of_1	5'_and_3'
KB668222	1091424	1091495	Fwd	AFUN010603-RA	1_of_1	5'_and_3'
KB668222	1101005	1102557	Rev	AFUN010605-RA	9_of_9	3'_only
KB668222	1102628	1102777	Rev	AFUN010605-RA	8_of_9
KB668222	1103080	1103145	Rev	AFUN010605-RA	7_of_9	5'_and_3'
KB668222	1103296	1103377	Rev	AFUN010605-RA	6_of_9	5'_and_3'
KB668222	1103645	1103734	Rev	AFUN010605-RA	5_of_9	5'_and_3'
KB668222	1103833	1103908	Rev	AFUN010605-RA	4_of_9	5'_and_3'
KB668222	1104327	1104490	Rev	AFUN010605-RA	3_of_9	5'_and_3'
KB668222	1104618	1104711	Rev	AFUN010605-RA	2_of_9	5'_and_3'
KB668222	1104937	1105011	Rev	AFUN010605-RA	1_of_9	5'_and_3'
KB668222	1127158	1128558	Fwd	AFUN010606-RA	1_of_1	5'_and_3'
KB668222	1152239	1153960	Fwd	AFUN010607-RA	1_of_1	5'_and_3'
KB668222	1161131	1161194	Fwd	AFUN010608-RA	1_of_17	5'_and_3'
KB668222	1161316	1161439	Fwd	AFUN010608-RA	2_of_17	5'_and_3'
KB668222	1161579	1161917	Fwd	AFUN010608-RA	3_of_17	5'_and_3'
KB668222	1162136	1162203	Fwd	AFUN010608-RA	4_of_17	5'_and_3'
KB668222	1162288	1162349	Fwd	AFUN010608-RA	5_of_17	5'_and_3'
KB668222	1162559	1162623	Fwd	AFUN010608-RA	6_of_17	5'_and_3'
KB668222	1162759	1162809	Fwd	AFUN010608-RA	7_of_17	3'_only
KB668222	1162992	1163625	Fwd	AFUN010608-RA	8_of_17	5'_and_3'
KB668222	1163762	1166683	Fwd	AFUN010608-RA	9_of_17	5'_and_3'
KB668222	1166741	1166802	Fwd	AFUN010608-RA	10_of_17	5'_and_3'
KB668222	1166881	1166952	Fwd	AFUN010608-RA	11_of_17	5'_and_3'
KB668222	1167140	1168134	Fwd	AFUN010608-RA	12_of_17	3'_only
KB668222	1168243	1169057	Fwd	AFUN010608-RA	13_of_17	5'_and_3'
KB668222	1169457	1170668	Fwd	AFUN010608-RA	14_of_17	5'_and_3'
KB668222	1170732	1170807	Fwd	AFUN010608-RA	15_of_17	5'_and_3'
KB668222	1170970	1173038	Fwd	AFUN010608-RA	16_of_17	5'_and_3'
KB668222	1173373	1175990	Fwd	AFUN010608-RA	17_of_17	5'_and_3'
KB668222	1180947	1181016	Fwd	AFUN010609-RA	1_of_1	3'_only
KB668222	1190670	1190770	Rev	AFUN010610-RA	12_of_12	5'_and_3'
KB668222	1190901	1190977	Rev	AFUN010610-RA	11_of_12	5'_and_3'
KB668222	1191395	1191468	Rev	AFUN010610-RA	10_of_12	5'_and_3'
KB668222	1191659	1191732	Rev	AFUN010610-RA	9_of_12	5'_and_3'
KB668222	1191948	1192035	Rev	AFUN010610-RA	8_of_12	5'_and_3'
KB668222	1192279	1192348	Rev	AFUN010610-RA	7_of_12	5'_and_3'
KB668222	1192523	1192594	Rev	AFUN010610-RA	6_of_12	5'_and_3'
KB668222	1192980	1193092	Rev	AFUN010610-RA	5_of_12	5'_and_3'
KB668222	1193269	1193343	Rev	AFUN010610-RA	4_of_12	5'_and_3'
KB668222	1193442	1193519	Rev	AFUN010610-RA	3_of_12	5'_and_3'
KB668222	1193933	1194010	Rev	AFUN010610-RA	2_of_12	5'_and_3'
KB668222	1194725	1196134	Rev	AFUN010610-RA	1_of_12	5'_and_3'
KB668222	1198526	1198588	Rev	AFUN010611-RA	7_of_7
KB668222	1198807	1198962	Rev	AFUN010611-RA	6_of_7
KB668222	1199102	1199188	Rev	AFUN010611-RA	5_of_7
KB668222	1199310	1199379	Rev	AFUN010611-RA	4_of_7
KB668222	1199838	1200891	Rev	AFUN010611-RA	3_of_7
KB668222	1201190	1201930	Rev	AFUN010611-RA	2_of_7
KB668222	1202121	1203080	Rev	AFUN010611-RA	1_of_7
KB668222	1218119	1218413	Fwd	AFUN010612-RA	1_of_2
KB668222	1218530	1220015	Fwd	AFUN010612-RA	2_of_2
KB668222	1285875	1288089	Fwd	AFUN010613-RA	1_of_6	3'_only
KB668222	1288149	1288220	Fwd	AFUN010613-RA	2_of_6	5'_and_3'
KB668222	1288378	1288443	Fwd	AFUN010613-RA	3_of_6	5'_and_3'
KB668222	1288625	1288691	Fwd	AFUN010613-RA	4_of_6	5'_and_3'
KB668222	1289005	1293249	Fwd	AFUN010613-RA	5_of_6	3'_only
KB668222	1293353	1293815	Fwd	AFUN010613-RA	6_of_6	5'_and_3'
KB668222	1299141	1299209	Rev	AFUN010614-RA	3_of_3	5'_and_3'
KB668222	1299507	1299577	Rev	AFUN010614-RA	2_of_3	5'_and_3'
KB668222	1299805	1299867	Rev	AFUN010614-RA	1_of_3	5'_and_3'
KB668222	1352637	1353685	Fwd	AFUN010615-RA	1_of_1
KB668222	1432236	1432316	Fwd	AFUN010616-RA	1_of_5
KB668222	1432612	1437302	Fwd	AFUN010616-RA	2_of_5
KB668222	1437435	1437502	Fwd	AFUN010616-RA	3_of_5	5'_and_3'
KB668222	1437691	1437775	Fwd	AFUN010616-RA	4_of_5
KB668222	1437963	1438057	Fwd	AFUN010616-RA	5_of_5
KB668222	1457048	1457123	Fwd	AFUN010617-RA	1_of_3	5'_and_3'
KB668222	1460040	1460115	Fwd	AFUN010617-RA	2_of_3	5'_and_3'
KB668222	1460393	1460467	Fwd	AFUN010617-RA	3_of_3	5'_and_3'
KB668222	1463083	1463152	Fwd	AFUN010618-RA	1_of_8	5'_and_3'
KB668222	1463362	1463446	Fwd	AFUN010618-RA	2_of_8	5'_and_3'
KB668222	1463907	1464007	Fwd	AFUN010618-RA	3_of_8	5'_and_3'
KB668222	1464047	1464116	Fwd	AFUN010618-RA	4_of_8	5'_and_3'
KB668222	1464425	1464488	Fwd	AFUN010618-RA	5_of_8	5'_and_3'
KB668222	1464603	1464667	Fwd	AFUN010618-RA	6_of_8	5'_and_3'
KB668222	1464874	1464931	Fwd	AFUN010618-RA	7_of_8	5'_and_3'
KB668222	1465803	1465867	Fwd	AFUN010618-RA	8_of_8
KB668222	1468820	1468894	Rev	AFUN010620-RA	1_of_1	5'_and_3'
KB668222	1517384	1517596	Fwd	AFUN010622-RA	1_of_1
KB668222	1542233	1545753	Fwd	AFUN010623-RA	1_of_10	3'_only
KB668222	1546000	1549277	Fwd	AFUN010623-RA	2_of_10
KB668222	1549441	1553260	Fwd	AFUN010623-RA	3_of_10
KB668222	1553530	1553612	Fwd	AFUN010623-RA	4_of_10	5'_and_3'
KB668222	1553884	1554396	Fwd	AFUN010623-RA	5_of_10
KB668222	1554516	1554623	Fwd	AFUN010623-RA	6_of_10
KB668222	1554819	1554906	Fwd	AFUN010623-RA	7_of_10	5'_and_3'
KB668222	1555118	1556252	Fwd	AFUN010623-RA	8_of_10
KB668222	1556394	1556576	Fwd	AFUN010623-RA	9_of_10
KB668222	1556728	1561011	Fwd	AFUN010623-RA	10_of_10	5'_and_3'
KB668222	1564909	1565120	Rev	AFUN015151-RA	1_of_1
KB668222	1568836	1568898	Fwd	AFUN010624-RA	1_of_1
KB668222	1595014	1595426	Fwd	AFUN010625-RA	1_of_3	5'_and_3'
KB668222	1595708	1595779	Fwd	AFUN010625-RA	2_of_3	5'_and_3'
KB668222	1595916	1597882	Fwd	AFUN010625-RA	3_of_3	5'_and_3'
KB668222	1599894	1600220	Rev	AFUN010626-RA	2_of_2	5'_and_3'
KB668222	1600359	1600424	Rev	AFUN010626-RA	1_of_2	5'_and_3'
KB668222	1621506	1621621	Fwd	AFUN010627-RA	1_of_2	3'_only
KB668222	1621879	1628300	Fwd	AFUN010627-RA	2_of_2	3'_only
KB668222	1707841	1707911	Rev	AFUN010628-RA	16_of_16	5'_and_3'
KB668222	1709057	1709846	Rev	AFUN010628-RA	15_of_16
KB668222	1709980	1710049	Rev	AFUN010628-RA	14_of_16	5'_and_3'
KB668222	1711162	1712589	Rev	AFUN010628-RA	13_of_16	5'_only
KB668222	1712739	1712830	Rev	AFUN010628-RA	12_of_16	5'_and_3'
KB668222	1713042	1713119	Rev	AFUN010628-RA	11_of_16	5'_and_3'
KB668222	1713362	1713432	Rev	AFUN010628-RA	10_of_16	5'_and_3'
KB668222	1713991	1714068	Rev	AFUN010628-RA	9_of_16	5'_and_3'
KB668222	1714420	1714503	Rev	AFUN010628-RA	8_of_16	5'_and_3'
KB668222	1715134	1715217	Rev	AFUN010628-RA	7_of_16	5'_and_3'
KB668222	1715329	1715395	Rev	AFUN010628-RA	6_of_16	5'_and_3'
KB668222	1719979	1720196	Rev	AFUN010628-RA	5_of_16	5'_and_3'
KB668222	1720378	1720543	Rev	AFUN010628-RA	4_of_16	5'_and_3'
KB668222	1720751	1722470	Rev	AFUN010628-RA	3_of_16	5'_and_3'
KB668222	1722574	1723125	Rev	AFUN010628-RA	2_of_16
KB668222	1724364	1724433	Rev	AFUN010628-RA	1_of_16	5'_and_3'
KB668222	1725976	1726076	Fwd	AFUN010629-RA	1_of_2	5'_and_3'
KB668222	1726171	1726305	Fwd	AFUN010629-RA	2_of_2	5'_and_3'
KB668222	1728629	1728687	Rev	AFUN010630-RA	1_of_1
KB668222	1737940	1738273	Rev	AFUN010631-RA	1_of_1	5'_and_3'
KB668222	1763963	1764537	Rev	AFUN010632-RA	3_of_3	5'_and_3'
KB668222	1764709	1765904	Rev	AFUN010632-RA	2_of_3	5'_and_3'
KB668222	1765984	1766977	Rev	AFUN010632-RA	1_of_3	5'_and_3'
KB668222	1807969	1808452	Rev	AFUN010633-RA	5_of_5	5'_and_3'
KB668222	1808624	1808738	Rev	AFUN010633-RA	4_of_5	5'_and_3'
KB668222	1808818	1809316	Rev	AFUN010633-RA	3_of_5	5'_and_3'
KB668222	1809514	1810922	Rev	AFUN010633-RA	2_of_5	5'_and_3'
KB668222	1811140	1811394	Rev	AFUN010633-RA	1_of_5	5'_and_3'
KB668223	21507	23058	Fwd	AFUN009024-RA	1_of_1
KB668223	23892	23938	Fwd	AFUN009025-RA	1_of_2
KB668223	24060	24106	Fwd	AFUN009025-RA	2_of_2
KB668223	171589	171672	Fwd	AFUN009026-RA	1_of_2	5'_and_3'
KB668223	171834	171912	Fwd	AFUN009026-RA	2_of_2	5'_and_3'
KB668223	172510	172576	Rev	AFUN009027-RA	9_of_9	5'_and_3'
KB668223	172716	172792	Rev	AFUN009027-RA	8_of_9	5'_and_3'
KB668223	172970	173198	Rev	AFUN009027-RA	7_of_9	5'_and_3'
KB668223	173428	173491	Rev	AFUN009027-RA	6_of_9	5'_and_3'
KB668223	173665	173737	Rev	AFUN009027-RA	5_of_9	5'_and_3'
KB668223	174261	174332	Rev	AFUN009027-RA	4_of_9	5'_and_3'
KB668223	174500	174572	Rev	AFUN009027-RA	3_of_9	5'_and_3'
KB668223	174874	174958	Rev	AFUN009027-RA	2_of_9	5'_and_3'
KB668223	175068	177557	Rev	AFUN009027-RA	1_of_9	5'_and_3'
KB668223	230969	231052	Fwd	AFUN014972-RA	1_of_4	5'_and_3'
KB668223	231150	231211	Fwd	AFUN014972-RA	2_of_4	5'_and_3'
KB668223	231341	231427	Fwd	AFUN014972-RA	3_of_4	5'_and_3'
KB668223	231497	231590	Fwd	AFUN014972-RA	4_of_4	5'_and_3'
KB668223	252617	252865	Fwd	AFUN009028-RA	1_of_3	3'_only
KB668223	252968	253051	Fwd	AFUN009028-RA	2_of_3	5'_and_3'
KB668223	253246	253531	Fwd	AFUN009028-RA	3_of_3	5'_only
KB668223	444787	444860	Fwd	AFUN009029-RA	1_of_3	5'_and_3'
KB668223	445635	445704	Fwd	AFUN009029-RA	2_of_3	5'_and_3'
KB668223	445865	445945	Fwd	AFUN009029-RA	3_of_3	5'_and_3'
KB668223	447450	447726	Rev	AFUN009030-RA	3_of_3	5'_and_3'
KB668223	448682	448751	Rev	AFUN009030-RA	2_of_3	5'_and_3'
KB668223	448943	449498	Rev	AFUN009030-RA	1_of_3	5'_and_3'
KB668223	455439	455508	Rev	AFUN009031-RA	14_of_14	5'_and_3'
KB668223	455901	455973	Rev	AFUN009031-RA	13_of_14	5'_and_3'
KB668223	456283	456368	Rev	AFUN009031-RA	12_of_14	5'_and_3'
KB668223	456621	457451	Rev	AFUN009031-RA	11_of_14	5'_and_3'
KB668223	458502	461198	Rev	AFUN009031-RA	10_of_14	5'_and_3'
KB668223	462064	464962	Rev	AFUN009031-RA	9_of_14	5'_only
KB668223	465203	465281	Rev	AFUN009031-RA	8_of_14	5'_and_3'
KB668223	465746	465812	Rev	AFUN009031-RA	7_of_14	5'_and_3'
KB668223	465932	466007	Rev	AFUN009031-RA	6_of_14	5'_and_3'
KB668223	466245	466387	Rev	AFUN009031-RA	5_of_14	5'_and_3'
KB668223	466530	467609	Rev	AFUN009031-RA	4_of_14	5'_and_3'
KB668223	467751	467816	Rev	AFUN009031-RA	3_of_14
KB668223	468039	468103	Rev	AFUN009031-RA	2_of_14
KB668223	468285	468345	Rev	AFUN009031-RA	1_of_14	3'_only
KB668223	484805	484902	Rev	AFUN009033-RA	1_of_1	5'_and_3'
KB668223	492039	492100	Fwd	AFUN009035-RA	1_of_1	5'_and_3'
KB668223	493563	493628	Rev	AFUN009036-RA	1_of_1	5'_and_3'
KB668223	494467	494530	Rev	AFUN009037-RA	4_of_4	5'_and_3'
KB668223	494711	494777	Rev	AFUN009037-RA	3_of_4	5'_and_3'
KB668223	494964	495047	Rev	AFUN009037-RA	2_of_4	5'_and_3'
KB668223	495393	495596	Rev	AFUN009037-RA	1_of_4	5'_and_3'
KB668223	497226	497296	Fwd	AFUN009038-RA	1_of_1	5'_and_3'
KB668223	502090	502529	Rev	AFUN009039-RA	5_of_5	5'_and_3'
KB668223	502840	502923	Rev	AFUN009039-RA	4_of_5	5'_and_3'
KB668223	503282	504133	Rev	AFUN009039-RA	3_of_5	5'_and_3'
KB668223	505831	505904	Rev	AFUN009039-RA	2_of_5	5'_and_3'
KB668223	505952	506088	Rev	AFUN009039-RA	1_of_5	5'_and_3'
KB668223	507751	507812	Fwd	AFUN009040-RA	1_of_1	5'_and_3'
KB668223	511194	511264	Fwd	AFUN009042-RA	1_of_3	5'_and_3'
KB668223	511613	511677	Fwd	AFUN009042-RA	2_of_3	5'_and_3'
KB668223	511786	511848	Fwd	AFUN009042-RA	3_of_3	5'_only
KB668223	512907	512977	Rev	AFUN009043-RA	4_of_4	5'_and_3'
KB668223	513038	513105	Rev	AFUN009043-RA	3_of_4	5'_and_3'
KB668223	513120	513489	Rev	AFUN009043-RA	2_of_4
KB668223	514251	514319	Rev	AFUN009043-RA	1_of_4	5'_and_3'
KB668223	515060	515388	Fwd	AFUN009044-RA	1_of_5	5'_and_3'
KB668223	515639	515707	Fwd	AFUN009044-RA	2_of_5	5'_and_3'
KB668223	518389	518468	Fwd	AFUN009044-RA	3_of_5	5'_and_3'
KB668223	518836	518907	Fwd	AFUN009044-RA	4_of_5	5'_and_3'
KB668223	519077	519150	Fwd	AFUN009044-RA	5_of_5	5'_and_3'
KB668223	521985	522050	Rev	AFUN009045-RA	1_of_1
KB668223	530023	530520	Fwd	AFUN009047-RA	1_of_5	5'_and_3'
KB668223	530586	532514	Fwd	AFUN009047-RA	2_of_5	5'_and_3'
KB668223	532798	532879	Fwd	AFUN009047-RA	3_of_5	5'_and_3'
KB668223	533091	533167	Fwd	AFUN009047-RA	4_of_5	5'_and_3'
KB668223	533294	533368	Fwd	AFUN009047-RA	5_of_5	5'_and_3'
KB668223	537165	537613	Rev	AFUN009048-RA	7_of_7	5'_and_3'
KB668223	537769	538105	Rev	AFUN009048-RA	6_of_7	5'_and_3'
KB668223	538930	539000	Rev	AFUN009048-RA	5_of_7	5'_and_3'
KB668223	539194	540821	Rev	AFUN009048-RA	4_of_7
KB668223	541146	541214	Rev	AFUN009048-RA	3_of_7	3'_only
KB668223	542263	542342	Rev	AFUN009048-RA	2_of_7	5'_and_3'
KB668223	542949	543038	Rev	AFUN009048-RA	1_of_7	5'_and_3'
KB668223	547864	548046	Fwd	AFUN009049-RA	1_of_1	3'_only
KB668223	549960	550031	Rev	AFUN009050-RA	1_of_1	5'_and_3'
KB668223	552740	552804	Rev	AFUN009051-RA	6_of_6	5'_and_3'
KB668223	552909	553213	Rev	AFUN009051-RA	5_of_6	5'_and_3'
KB668223	553384	553454	Rev	AFUN009051-RA	4_of_6	5'_and_3'
KB668223	553877	553955	Rev	AFUN009051-RA	3_of_6	5'_and_3'
KB668223	556603	556669	Rev	AFUN009051-RA	2_of_6	5'_and_3'
KB668223	557417	557490	Rev	AFUN009051-RA	1_of_6	5'_and_3'
KB668223	561693	561772	Fwd	AFUN009052-RA	1_of_1
KB668223	562795	562860	Rev	AFUN009053-RA	2_of_2	5'_and_3'
KB668223	564001	564060	Rev	AFUN009053-RA	1_of_2	5'_and_3'
KB668234	37767	37836	Fwd	AFUN000001-RA	1_of_3	5'_and_3'
KB668234	38416	41930	Fwd	AFUN000001-RA	2_of_3
KB668234	42453	42548	Fwd	AFUN000001-RA	3_of_3	3'_only
KB668234	42453	42548	Rev	AFUN014001-RA	2_of_2
KB668234	43164	43184	Rev	AFUN014001-RA	1_of_2
KB668234	76783	76847	Fwd	AFUN000002-RA	1_of_3	5'_and_3'
KB668234	77745	78100	Fwd	AFUN000002-RA	2_of_3
KB668234	78776	78849	Fwd	AFUN000002-RA	3_of_3
KB668234	98942	99629	Fwd	AFUN000004-RA	1_of_2
KB668234	102827	103939	Fwd	AFUN000004-RA	2_of_2	5'_only
KB668234	103842	104025	Rev	AFUN014002-RA	1_of_1
KB668234	144702	144914	Fwd	AFUN000005-RA	1_of_1	3'_only
KB668234	149268	149354	Fwd	AFUN000007-RA	1_of_9	5'_and_3'
KB668234	149588	149649	Fwd	AFUN000007-RA	2_of_9	5'_and_3'
KB668234	150058	150136	Fwd	AFUN000007-RA	3_of_9	5'_and_3'
KB668234	150574	151132	Fwd	AFUN000007-RA	4_of_9	5'_and_3'
KB668234	151171	151972	Fwd	AFUN000007-RA	5_of_9	5'_and_3'
KB668234	152812	152879	Fwd	AFUN000007-RA	6_of_9	5'_and_3'
KB668234	153516	154354	Fwd	AFUN000007-RA	7_of_9	5'_only
KB668234	154509	155590	Fwd	AFUN000007-RA	8_of_9	5'_and_3'
KB668234	155678	155764	Fwd	AFUN000007-RA	9_of_9	5'_and_3'
KB668234	162122	163616	Rev	AFUN000008-RA	12_of_12	5'_and_3'
KB668234	163786	163866	Rev	AFUN000008-RA	11_of_12	5'_and_3'
KB668234	164017	164576	Rev	AFUN000008-RA	10_of_12	5'_and_3'
KB668234	164674	164747	Rev	AFUN000008-RA	9_of_12	5'_and_3'
KB668234	164976	165052	Rev	AFUN000008-RA	8_of_12	5'_and_3'
KB668234	165324	166491	Rev	AFUN000008-RA	7_of_12	5'_and_3'
KB668234	166622	166772	Rev	AFUN000008-RA	6_of_12
KB668234	166880	167127	Rev	AFUN000008-RA	5_of_12	5'_only
KB668234	167371	170210	Rev	AFUN000008-RA	4_of_12	5'_and_3'
KB668234	170313	170406	Rev	AFUN000008-RA	3_of_12	5'_and_3'
KB668234	170527	171300	Rev	AFUN000008-RA	2_of_12	5'_and_3'
KB668234	171427	173382	Rev	AFUN000008-RA	1_of_12	5'_and_3'
KB668234	189679	189758	Rev	AFUN000009-RA	3_of_3	5'_and_3'
KB668234	190123	190211	Rev	AFUN000009-RA	2_of_3	5'_and_3'
KB668234	191233	191315	Rev	AFUN000009-RA	1_of_3	5'_and_3'
KB668234	193942	194010	Rev	AFUN000010-RA	12_of_12	5'_and_3'
KB668234	195159	195232	Rev	AFUN000010-RA	11_of_12	5'_and_3'
KB668234	195363	195489	Rev	AFUN000010-RA	10_of_12	3'_only
KB668234	195513	196228	Rev	AFUN000010-RA	9_of_12
KB668234	196822	198516	Rev	AFUN000010-RA	8_of_12
KB668234	198830	198913	Rev	AFUN000010-RA	7_of_12	5'_and_3'
KB668234	199094	199175	Rev	AFUN000010-RA	6_of_12	5'_and_3'
KB668234	199296	199361	Rev	AFUN000010-RA	5_of_12	5'_and_3'
KB668234	199566	200037	Rev	AFUN000010-RA	4_of_12	3'_only
KB668234	200320	200397	Rev	AFUN000010-RA	3_of_12	5'_and_3'
KB668234	200552	200839	Rev	AFUN000010-RA	2_of_12	5'_and_3'
KB668234	201007	201156	Rev	AFUN000010-RA	1_of_12	5'_and_3'
KB668234	206183	206275	Rev	AFUN000011-RA	4_of_4	5'_and_3'
KB668234	206429	206515	Rev	AFUN000011-RA	3_of_4	5'_and_3'
KB668234	206645	206723	Rev	AFUN000011-RA	2_of_4	5'_and_3'
KB668234	206832	209597	Rev	AFUN000011-RA	1_of_4	3'_only
KB668234	238273	238615	Rev	AFUN000012-RA	10_of_10
KB668234	238980	239063	Rev	AFUN000012-RA	9_of_10	5'_and_3'
KB668234	239259	239337	Rev	AFUN000012-RA	8_of_10	5'_and_3'
KB668234	239585	239652	Rev	AFUN000012-RA	7_of_10	5'_and_3'
KB668234	240143	240224	Rev	AFUN000012-RA	6_of_10	5'_and_3'
KB668234	240417	240488	Rev	AFUN000012-RA	5_of_10	5'_and_3'
KB668234	240957	241038	Rev	AFUN000012-RA	4_of_10	5'_and_3'
KB668234	241509	243669	Rev	AFUN000012-RA	3_of_10	5'_and_3'
KB668234	244245	244330	Rev	AFUN000012-RA	2_of_10	5'_and_3'
KB668234	244465	246366	Rev	AFUN000012-RA	1_of_10	5'_and_3'
KB668234	253348	253411	Fwd	AFUN000013-RA	1_of_4	5'_and_3'
KB668234	253528	253597	Fwd	AFUN000013-RA	2_of_4	5'_and_3'
KB668234	253728	253808	Fwd	AFUN000013-RA	3_of_4	5'_and_3'
KB668234	256269	256326	Rev	AFUN000014-RA	1_of_1	5'_and_3'
KB668234	256277	256331	Fwd	AFUN000013-RA	4_of_4
KB668234	262658	262753	Rev	AFUN000015-RA	1_of_1
KB668234	286208	286296	Fwd	AFUN000017-RA	1_of_6
KB668234	286638	286708	Fwd	AFUN000017-RA	2_of_6	5'_and_3'
KB668234	287973	288661	Fwd	AFUN000017-RA	3_of_6	5'_only
KB668234	290032	290101	Fwd	AFUN000017-RA	4_of_6
KB668234	291496	292682	Fwd	AFUN000017-RA	5_of_6
KB668234	293738	294116	Fwd	AFUN000017-RA	6_of_6	5'_and_3'
KB668234	298161	298241	Rev	AFUN000018-RA	3_of_3	5'_and_3'
KB668234	298408	298475	Rev	AFUN000018-RA	2_of_3	5'_and_3'
KB668234	299064	299832	Rev	AFUN000018-RA	1_of_3	5'_and_3'
KB668234	307708	307773	Rev	AFUN014003-RA	1_of_1	5'_and_3'
KB668234	333790	333873	Rev	AFUN000020-RA	2_of_2	5'_and_3'
KB668234	335018	336758	Rev	AFUN000020-RA	1_of_2	5'_and_3'
KB668234	341236	342209	Rev	AFUN000022-RA	7_of_7
KB668234	342626	342693	Rev	AFUN000022-RA	6_of_7	5'_and_3'
KB668234	342825	343152	Rev	AFUN000022-RA	5_of_7	5'_and_3'
KB668234	343543	344511	Rev	AFUN000022-RA	4_of_7	5'_and_3'
KB668234	344565	344673	Rev	AFUN000022-RA	3_of_7	5'_and_3'
KB668234	344976	345303	Rev	AFUN000022-RA	2_of_7	5'_and_3'
KB668234	345491	345555	Rev	AFUN000022-RA	1_of_7	5'_and_3'
KB668234	356156	356217	Rev	AFUN000023-RA	10_of_10	5'_and_3'
KB668234	356291	356366	Rev	AFUN000023-RA	9_of_10	5'_and_3'
KB668234	356389	357730	Rev	AFUN000023-RA	8_of_10
KB668234	358166	358242	Rev	AFUN000023-RA	7_of_10	5'_and_3'
KB668234	358397	358455	Rev	AFUN000023-RA	6_of_10	5'_and_3'
KB668234	359566	360888	Rev	AFUN000023-RA	5_of_10
KB668234	361014	361082	Rev	AFUN000023-RA	4_of_10	5'_and_3'
KB668234	361132	362867	Rev	AFUN000023-RA	3_of_10
KB668234	363778	363853	Rev	AFUN000023-RA	2_of_10	5'_and_3'
KB668234	363998	365555	Rev	AFUN000023-RA	1_of_10	3'_only
KB668234	365948	366021	Fwd	AFUN000024-RA	1_of_7	5'_and_3'
KB668234	366985	368375	Fwd	AFUN000024-RA	2_of_7	5'_only
KB668234	368499	368562	Fwd	AFUN000024-RA	3_of_7
KB668234	369442	369512	Fwd	AFUN000024-RA	4_of_7
KB668234	369617	371191	Fwd	AFUN000024-RA	5_of_7
KB668234	371337	372753	Fwd	AFUN000024-RA	6_of_7	5'_and_3'
KB668234	373756	373838	Fwd	AFUN000024-RA	7_of_7	5'_and_3'
KB668234	379120	379208	Rev	AFUN000025-RA	3_of_3	5'_and_3'
KB668234	381334	382477	Rev	AFUN000025-RA	2_of_3	5'_and_3'
KB668234	382639	384226	Rev	AFUN000025-RA	1_of_3	3'_only
KB668234	388471	389370	Rev	AFUN000026-RA	1_of_1	5'_and_3'
KB668234	394142	394206	Rev	AFUN000027-RA	2_of_2	5'_and_3'
KB668234	394480	394554	Rev	AFUN000027-RA	1_of_2	5'_and_3'
KB668234	398066	398136	Fwd	AFUN000028-RA	1_of_1	5'_and_3'
KB668234	402274	402345	Rev	AFUN000030-RA	4_of_4	5'_and_3'
KB668234	402696	402786	Rev	AFUN000030-RA	3_of_4	5'_and_3'
KB668234	405365	405430	Rev	AFUN000030-RA	2_of_4	5'_and_3'
KB668234	407638	407764	Rev	AFUN000030-RA	1_of_4	5'_and_3'
KB668234	412167	412236	Fwd	AFUN000032-RA	1_of_1	5'_and_3'
KB668234	417505	417572	Rev	AFUN000033-RA	4_of_4	5'_and_3'
KB668234	417703	417781	Rev	AFUN000033-RA	3_of_4	5'_and_3'
KB668234	417990	418066	Rev	AFUN000033-RA	2_of_4	5'_and_3'
KB668234	418139	418598	Rev	AFUN000033-RA	1_of_4	5'_and_3'
KB668234	420004	420378	Fwd	AFUN000034-RA	1_of_8	5'_and_3'
KB668234	421312	423084	Fwd	AFUN000034-RA	2_of_8
KB668234	423111	424031	Fwd	AFUN000034-RA	3_of_8	3'_only
KB668234	424184	424255	Fwd	AFUN000034-RA	4_of_8	5'_and_3'
KB668234	426086	426193	Fwd	AFUN000034-RA	5_of_8	5'_and_3'
KB668234	426422	429149	Fwd	AFUN000034-RA	6_of_8	5'_and_3'
KB668234	429257	430661	Fwd	AFUN000034-RA	7_of_8
KB668234	431014	431083	Fwd	AFUN000034-RA	8_of_8	5'_and_3'
KB668234	439948	440059	Fwd	AFUN000035-RA	1_of_5	5'_and_3'
KB668234	440274	440661	Fwd	AFUN000035-RA	2_of_5	5'_and_3'
KB668234	440944	441021	Fwd	AFUN000035-RA	3_of_5	5'_and_3'
KB668234	441388	441461	Fwd	AFUN000035-RA	4_of_5	5'_and_3'
KB668234	441579	441657	Fwd	AFUN000035-RA	5_of_5	5'_and_3'
KB668234	445592	446009	Fwd	AFUN000036-RA	1_of_4	5'_and_3'
KB668234	446262	446347	Fwd	AFUN000036-RA	2_of_4	5'_and_3'
KB668234	448102	448167	Fwd	AFUN000036-RA	3_of_4	5'_and_3'
KB668234	448496	449084	Fwd	AFUN000036-RA	4_of_4
KB668234	449957	450027	Fwd	AFUN000037-RA	1_of_2	5'_and_3'
KB668234	451968	452032	Fwd	AFUN000037-RA	2_of_2	5'_and_3'
KB668234	453289	453381	Rev	AFUN000038-RA	2_of_2	5'_and_3'
KB668234	453579	454048	Rev	AFUN000038-RA	1_of_2	5'_and_3'
KB668234	455468	455511	Rev	AFUN014004-RA	1_of_1
KB668234	456014	456089	Rev	AFUN000040-RA	2_of_2
KB668234	456246	456334	Rev	AFUN000040-RA	1_of_2
KB668234	462285	462419	Fwd	AFUN000041-RA	1_of_3	5'_and_3'
KB668234	462875	462953	Fwd	AFUN000041-RA	2_of_3	5'_and_3'
KB668234	463190	463263	Fwd	AFUN000041-RA	3_of_3	5'_and_3'
KB668234	465207	465347	Fwd	AFUN000042-RA	1_of_1	5'_and_3'
KB668234	468285	468350	Fwd	AFUN000043-RA	1_of_2
KB668234	469383	469454	Fwd	AFUN000043-RA	2_of_2
KB668234	517318	517402	Fwd	AFUN000044-RA	1_of_11
KB668234	517563	520029	Fwd	AFUN000044-RA	2_of_11
KB668234	520064	523459	Fwd	AFUN000044-RA	3_of_11	5'_and_3'
KB668234	523608	524010	Fwd	AFUN000044-RA	4_of_11	5'_and_3'
KB668234	525111	525201	Fwd	AFUN000044-RA	5_of_11	5'_and_3'
KB668234	525303	525385	Fwd	AFUN000044-RA	6_of_11	5'_and_3'
KB668234	525636	525706	Fwd	AFUN000044-RA	7_of_11	5'_and_3'
KB668234	525834	525905	Fwd	AFUN000044-RA	8_of_11	5'_and_3'
KB668234	526153	526225	Fwd	AFUN000044-RA	9_of_11	5'_and_3'
KB668234	526686	526930	Fwd	AFUN000044-RA	10_of_11	5'_and_3'
KB668234	527317	527397	Fwd	AFUN000044-RA	11_of_11	5'_and_3'
KB668234	531916	532006	Fwd	AFUN000045-RA	1_of_7	5'_and_3'
KB668234	532186	532269	Fwd	AFUN000045-RA	2_of_7	5'_and_3'
KB668234	532431	532495	Fwd	AFUN000045-RA	3_of_7	5'_and_3'
KB668234	533543	533780	Fwd	AFUN000045-RA	4_of_7
KB668234	533934	534021	Fwd	AFUN000045-RA	5_of_7	5'_and_3'
KB668234	534176	534249	Fwd	AFUN000045-RA	6_of_7	5'_and_3'
KB668234	535009	535075	Fwd	AFUN000045-RA	7_of_7	5'_and_3'
KB668234	543393	543465	Fwd	AFUN000047-RA	1_of_3	5'_and_3'
KB668234	543584	543654	Fwd	AFUN000047-RA	2_of_3	5'_and_3'
KB668234	544058	544120	Fwd	AFUN000047-RA	3_of_3	5'_and_3'
KB668234	595429	599515	Fwd	AFUN000048-RA	1_of_2
KB668234	599673	599782	Fwd	AFUN000048-RA	2_of_2
KB668245	1593	3101	Fwd	AFUN006215-RA	1_of_4	5'_and_3'
KB668245	3227	3321	Fwd	AFUN006215-RA	2_of_4
KB668245	3544	3624	Fwd	AFUN006215-RA	3_of_4
KB668245	3724	3794	Fwd	AFUN006215-RA	4_of_4
KB668245	5904	5971	Fwd	AFUN006216-RA	1_of_3	5'_and_3'
KB668245	6094	6234	Fwd	AFUN006216-RA	2_of_3	5'_and_3'
KB668245	6756	6818	Fwd	AFUN006216-RA	3_of_3	5'_and_3'
KB668245	40179	40322	Fwd	AFUN006217-RA	1_of_2	5'_and_3'
KB668245	41213	41290	Fwd	AFUN006217-RA	2_of_2
KB668245	41534	41562	Rev	AFUN014649-RA	1_of_1
KB668245	56710	57881	Rev	AFUN006218-RA	1_of_1	5'_and_3'
KB668245	81028	81596	Rev	AFUN006219-RA	2_of_2
KB668245	81899	81970	Rev	AFUN006219-RA	1_of_2	5'_and_3'
KB668245	101477	102141	Fwd	AFUN006221-RA	1_of_2	5'_and_3'
KB668245	102369	104376	Fwd	AFUN006221-RA	2_of_2	5'_and_3'
KB668245	105656	105720	Rev	AFUN006222-RA	6_of_6	5'_and_3'
KB668245	106429	106500	Rev	AFUN006222-RA	5_of_6
KB668245	106586	106714	Rev	AFUN006222-RA	4_of_6
KB668245	106905	106994	Rev	AFUN006222-RA	3_of_6	5'_and_3'
KB668245	107240	107306	Rev	AFUN006222-RA	2_of_6	5'_and_3'
KB668245	108293	108550	Rev	AFUN006222-RA	1_of_6	5'_and_3'
KB668245	111849	112780	Fwd	AFUN014650-RA	1_of_2
KB668245	111849	112780	Fwd	AFUN014650-RC	1_of_1
KB668245	112043	112780	Fwd	AFUN014650-RB	1_of_2	5'_only
KB668245	112043	112780	Fwd	AFUN014650-RD	1_of_1	5'_only
KB668245	112932	113056	Fwd	AFUN014650-RA	2_of_2
KB668245	112932	113056	Fwd	AFUN014650-RB	2_of_2
KB668245	136173	137788	Fwd	AFUN006223-RA	1_of_3	3'_only
KB668245	137945	138016	Fwd	AFUN006223-RA	2_of_3	5'_and_3'
KB668245	138112	138195	Fwd	AFUN006223-RA	3_of_3	5'_only
KB668245	183298	183414	Fwd	AFUN006224-RA	1_of_7	5'_and_3'
KB668245	183574	186787	Fwd	AFUN006224-RA	2_of_7	3'_only
KB668245	186941	187065	Fwd	AFUN006224-RA	3_of_7	5'_and_3'
KB668245	187455	187552	Fwd	AFUN006224-RA	4_of_7	5'_and_3'
KB668245	187814	189879	Fwd	AFUN006224-RA	5_of_7	5'_and_3'
KB668245	190018	194349	Fwd	AFUN006224-RA	6_of_7	5'_only
KB668245	194488	195460	Fwd	AFUN006224-RA	7_of_7
KB668245	204121	204217	Rev	AFUN014651-RA	2_of_2	5'_and_3'
KB668245	204121	204217	Rev	AFUN014651-RB	1_of_1	5'_and_3'
KB668245	204351	204417	Rev	AFUN014651-RA	1_of_2	5'_and_3'
KB668245	206297	206378	Fwd	AFUN006225-RA	1_of_4	5'_and_3'
KB668245	206611	207822	Fwd	AFUN006225-RA	2_of_4	5'_and_3'
KB668245	207939	208024	Fwd	AFUN006225-RA	3_of_4	5'_and_3'
KB668245	208181	211101	Fwd	AFUN006225-RA	4_of_4	5'_only
KB668245	215575	215646	Fwd	AFUN006226-RA	1_of_9	5'_and_3'
KB668245	215820	218090	Fwd	AFUN006226-RA	2_of_9
KB668245	219117	219190	Fwd	AFUN006226-RA	3_of_9
KB668245	219398	219473	Fwd	AFUN006226-RA	4_of_9	5'_and_3'
KB668245	219836	219908	Fwd	AFUN006226-RA	5_of_9	5'_and_3'
KB668245	220334	220409	Fwd	AFUN006226-RA	6_of_9	5'_and_3'
KB668245	220526	220696	Fwd	AFUN006226-RA	7_of_9	5'_and_3'
KB668245	220847	221477	Fwd	AFUN006226-RA	8_of_9
KB668245	221628	222327	Fwd	AFUN006226-RA	9_of_9	5'_and_3'
KB668245	234666	234808	Fwd	AFUN006227-RA	1_of_1
KB668245	239873	240303	Rev	AFUN006228-RA	2_of_2	5'_and_3'
KB668245	240574	240952	Rev	AFUN006228-RA	1_of_2
KB668245	247960	248035	Rev	AFUN014652-RA	1_of_1
KB668245	251499	251844	Rev	AFUN006229-RA	2_of_2	3'_only
KB668245	253758	253843	Rev	AFUN006229-RA	1_of_2	5'_and_3'
KB668245	271322	271969	Fwd	AFUN006230-RA	1_of_1
KB668245	302040	302142	Fwd	AFUN006231-RA	1_of_3
KB668245	302270	302330	Fwd	AFUN006231-RA	2_of_3
KB668245	302861	302951	Fwd	AFUN006231-RA	3_of_3
KB668245	329202	329263	Fwd	AFUN006233-RA	1_of_4	5'_and_3'
KB668245	329667	329742	Fwd	AFUN006233-RA	2_of_4	5'_and_3'
KB668245	330289	330520	Fwd	AFUN006233-RA	3_of_4	5'_and_3'
KB668245	330816	330950	Fwd	AFUN006233-RA	4_of_4	5'_and_3'
KB668245	335635	335703	Rev	AFUN006234-RA	5_of_5	5'_and_3'
KB668245	336029	336098	Rev	AFUN006234-RA	4_of_5	5'_and_3'
KB668245	336266	336525	Rev	AFUN006234-RA	3_of_5	3'_only
KB668245	336632	336712	Rev	AFUN006234-RA	2_of_5	3'_only
KB668245	336836	336922	Rev	AFUN006234-RA	1_of_5	5'_and_3'
KB668245	340532	340986	Fwd	AFUN006235-RA	1_of_2
KB668245	341126	341189	Fwd	AFUN006235-RA	2_of_2
KB668245	344810	344882	Rev	AFUN006236-RA	4_of_4	5'_and_3'
KB668245	345455	345523	Rev	AFUN006236-RA	3_of_4	5'_and_3'
KB668245	345874	348345	Rev	AFUN006236-RA	2_of_4	5'_and_3'
KB668245	348666	348795	Rev	AFUN006236-RA	1_of_4	5'_and_3'
KB668245	352917	353269	Fwd	AFUN014653-RA	1_of_1
KB668245	355483	355556	Fwd	AFUN006237-RA	1_of_3	5'_and_3'
KB668245	356560	356645	Fwd	AFUN006237-RA	2_of_3	5'_and_3'
KB668245	356822	356914	Fwd	AFUN006237-RA	3_of_3	5'_and_3'
KB668245	367755	369404	Fwd	AFUN006238-RA	1_of_4	5'_and_3'
KB668245	369616	369687	Fwd	AFUN006238-RA	2_of_4	5'_and_3'
KB668245	369944	370037	Fwd	AFUN006238-RA	3_of_4	5'_and_3'
KB668245	370195	370312	Fwd	AFUN006238-RA	4_of_4	5'_and_3'
KB668245	382411	382516	Rev	AFUN014654-RA	1_of_1
KB668245	391415	392236	Fwd	AFUN006239-RA	1_of_2
KB668245	392285	393938	Fwd	AFUN006239-RA	2_of_2
KB668245	392792	393983	Rev	AFUN006240-RA	5_of_5
KB668245	394255	394571	Rev	AFUN006240-RA	4_of_5
KB668245	394818	394891	Rev	AFUN006240-RA	3_of_5
KB668245	395107	395206	Rev	AFUN006240-RA	2_of_5
KB668245	395263	397409	Fwd	AFUN006241-RA	1_of_2
KB668245	395357	397321	Rev	AFUN006240-RA	1_of_5
KB668245	398126	405314	Fwd	AFUN006241-RA	2_of_2
KB668245	405708	405726	Rev	AFUN006242-RA	6_of_6
KB668245	406000	406121	Rev	AFUN006242-RA	5_of_6
KB668245	406218	406281	Rev	AFUN006242-RA	4_of_6
KB668245	406531	406597	Rev	AFUN006242-RA	3_of_6
KB668245	406772	407147	Fwd	AFUN006243-RA	1_of_3
KB668245	406816	407138	Rev	AFUN006242-RA	2_of_6
KB668245	407170	408030	Fwd	AFUN006243-RA	2_of_3
KB668245	407175	407305	Rev	AFUN006242-RA	1_of_6
KB668245	408311	408420	Fwd	AFUN006243-RA	3_of_3
KB668245	415556	415625	Rev	AFUN006244-RA	12_of_12	5'_and_3'
KB668245	416319	416393	Rev	AFUN006244-RA	11_of_12	5'_and_3'
KB668245	416693	416765	Rev	AFUN006244-RA	10_of_12	5'_and_3'
KB668245	416891	416952	Rev	AFUN006244-RA	9_of_12	5'_and_3'
KB668245	417282	417583	Rev	AFUN006244-RA	8_of_12
KB668245	417626	418985	Rev	AFUN006244-RA	7_of_12	3'_only
KB668245	419279	419624	Rev	AFUN006244-RA	6_of_12	5'_only
KB668245	419883	420179	Rev	AFUN006244-RA	5_of_12	5'_and_3'
KB668245	420262	420330	Rev	AFUN006244-RA	4_of_12	5'_and_3'
KB668245	420586	420882	Rev	AFUN006244-RA	3_of_12	5'_and_3'
KB668245	421165	421288	Rev	AFUN006244-RA	2_of_12	5'_and_3'
KB668245	421390	422201	Rev	AFUN006244-RA	1_of_12	5'_and_3'
KB668245	426233	426314	Rev	AFUN006245-RA	3_of_3
KB668245	426591	426908	Rev	AFUN006245-RA	2_of_3
KB668245	427063	428722	Rev	AFUN006245-RA	1_of_3
KB668245	441384	442235	Fwd	AFUN006246-RA	1_of_6	5'_and_3'
KB668245	442681	442770	Fwd	AFUN006246-RA	2_of_6	5'_and_3'
KB668245	443129	443606	Fwd	AFUN006246-RA	3_of_6	5'_and_3'
KB668245	444043	445120	Fwd	AFUN006246-RA	4_of_6	5'_and_3'
KB668245	445278	446441	Fwd	AFUN006246-RA	5_of_6	5'_and_3'
KB668245	446570	447974	Fwd	AFUN006246-RA	6_of_6	5'_only
KB668245	449734	449798	Rev	AFUN006247-RA	3_of_3	5'_and_3'
KB668245	450451	450520	Rev	AFUN006247-RA	2_of_3	5'_and_3'
KB668245	450589	450696	Rev	AFUN006247-RA	1_of_3	5'_and_3'
KB668245	452474	454670	Fwd	AFUN006248-RA	1_of_7	5'_and_3'
KB668245	455172	455306	Fwd	AFUN006248-RA	2_of_7
KB668245	456398	458031	Fwd	AFUN006248-RA	3_of_7	5'_and_3'
KB668245	461606	461765	Fwd	AFUN006248-RA	4_of_7	5'_and_3'
KB668245	462022	462114	Fwd	AFUN006248-RA	5_of_7	5'_and_3'
KB668245	462192	462279	Fwd	AFUN006248-RA	6_of_7	5'_and_3'
KB668245	462471	462539	Fwd	AFUN006248-RA	7_of_7	5'_and_3'
KB668245	465185	465248	Fwd	AFUN006249-RA	1_of_2	5'_and_3'
KB668245	465345	465433	Fwd	AFUN006249-RA	2_of_2	5'_and_3'
KB668245	466378	466442	Rev	AFUN006250-RA	3_of_3	5'_and_3'
KB668245	466603	466665	Rev	AFUN006250-RA	2_of_3	5'_and_3'
KB668245	466811	466870	Rev	AFUN006250-RA	1_of_3
KB668245	467896	468124	Rev	AFUN006251-RA	2_of_2	5'_and_3'
KB668245	468431	469802	Rev	AFUN006251-RA	1_of_2	5'_and_3'
KB668245	471786	472267	Fwd	AFUN006252-RA	1_of_2	5'_and_3'
KB668245	472404	473352	Fwd	AFUN006252-RA	2_of_2	5'_and_3'
KB668245	475480	475550	Rev	AFUN006253-RA	2_of_2	5'_and_3'
KB668245	475774	476042	Rev	AFUN006253-RA	1_of_2	5'_and_3'
KB668245	477017	477088	Fwd	AFUN006254-RA	1_of_8	5'_only
KB668245	477457	477569	Fwd	AFUN006254-RA	2_of_8	5'_and_3'
KB668245	477806	478197	Fwd	AFUN006254-RA	3_of_8	5'_and_3'
KB668245	478426	478504	Fwd	AFUN006254-RA	4_of_8	5'_and_3'
KB668245	478605	479660	Fwd	AFUN006254-RA	5_of_8	5'_and_3'
KB668245	479799	479855	Fwd	AFUN006254-RA	6_of_8	5'_and_3'
KB668245	480125	480231	Fwd	AFUN006254-RA	7_of_8	5'_and_3'
KB668245	480829	480984	Fwd	AFUN006254-RA	8_of_8	5'_and_3'
KB668245	485138	487992	Rev	AFUN006255-RA	8_of_8	3'_only
KB668245	489635	489739	Rev	AFUN006255-RA	7_of_8	5'_and_3'
KB668245	490049	490123	Rev	AFUN006255-RA	6_of_8	5'_and_3'
KB668245	490277	490338	Rev	AFUN006255-RA	5_of_8	5'_and_3'
KB668245	490427	490506	Rev	AFUN006255-RA	4_of_8	5'_and_3'
KB668245	490680	490752	Rev	AFUN006255-RA	3_of_8	5'_and_3'
KB668245	490921	491684	Rev	AFUN006255-RA	2_of_8	5'_and_3'
KB668245	491916	492105	Rev	AFUN006255-RA	1_of_8	5'_and_3'
KB668245	494994	495318	Fwd	AFUN006256-RA	1_of_3	5'_and_3'
KB668245	495544	495622	Fwd	AFUN006256-RA	2_of_3	5'_and_3'
KB668245	495754	495824	Fwd	AFUN006256-RA	3_of_3	5'_and_3'
KB668245	517422	518266	Fwd	AFUN014655-RA	1_of_1
KB668245	525301	525874	Fwd	AFUN006257-RA	1_of_3
KB668245	526169	527501	Fwd	AFUN006257-RA	2_of_3
KB668245	527631	530670	Fwd	AFUN006257-RA	3_of_3	5'_and_3'
KB668245	558291	559425	Rev	AFUN006258-RA	4_of_4	5'_and_3'
KB668245	559839	559924	Rev	AFUN006258-RA	3_of_4	5'_and_3'
KB668245	560289	561257	Rev	AFUN006258-RA	2_of_4	5'_and_3'
KB668245	561555	562453	Rev	AFUN006258-RA	1_of_4	5'_and_3'
KB668245	572757	572856	Rev	AFUN014656-RB	3_of_3	5'_only
KB668245	573187	574175	Rev	AFUN014656-RB	2_of_3
KB668245	573187	574175	Rev	AFUN014656-RC	2_of_2
KB668245	573192	573815	Rev	AFUN014656-RA	3_of_3	5'_and_3'
KB668245	573929	574175	Rev	AFUN014656-RA	2_of_3
KB668245	574307	574461	Rev	AFUN014656-RA	1_of_3	3'_only
KB668245	574307	574461	Rev	AFUN014656-RB	1_of_3	3'_only
KB668245	574307	574461	Rev	AFUN014656-RC	1_of_2	3'_only
KB668245	579821	579948	Rev	AFUN006260-RA	7_of_7	5'_and_3'
KB668245	580039	580099	Rev	AFUN006260-RA	6_of_7	5'_and_3'
KB668245	580300	580987	Rev	AFUN006260-RA	5_of_7	5'_and_3'
KB668245	581134	581146	Rev	AFUN006260-RA	4_of_7
KB668245	581285	582590	Rev	AFUN006260-RA	3_of_7
KB668245	583238	585692	Rev	AFUN006260-RA	2_of_7	5'_and_3'
KB668245	585869	586145	Rev	AFUN006260-RA	1_of_7	3'_only
KB668256	3009	3077	Rev	AFUN001308-RA	7_of_7	5'_and_3'
KB668256	3222	4446	Rev	AFUN001308-RA	6_of_7	5'_and_3'
KB668256	4540	4619	Rev	AFUN001308-RA	5_of_7	5'_and_3'
KB668256	4831	4905	Rev	AFUN001308-RA	4_of_7	5'_and_3'
KB668256	5035	5103	Rev	AFUN001308-RA	3_of_7	5'_and_3'
KB668256	7970	8053	Rev	AFUN001308-RA	2_of_7	5'_and_3'
KB668256	8553	9698	Rev	AFUN001308-RA	1_of_7	3'_only
KB668256	97387	97453	Fwd	AFUN001309-RA	1_of_1
KB668256	180636	181103	Rev	AFUN001310-RA	1_of_1	5'_and_3'
KB668256	227224	227300	Fwd	AFUN001311-RA	1_of_1	5'_and_3'
KB668256	231853	231947	Rev	AFUN001312-RA	2_of_2	5'_and_3'
KB668256	232840	232908	Rev	AFUN001312-RA	1_of_2	5'_and_3'
KB668256	234438	237522	Fwd	AFUN001313-RA	1_of_7	3'_only
KB668256	237421	237522	Rev	AFUN014152-RA	3_of_3
KB668256	238290	239024	Fwd	AFUN001313-RA	2_of_7	5'_and_3'
KB668256	238290	239024	Rev	AFUN014152-RA	2_of_3
KB668256	239244	239358	Fwd	AFUN001313-RA	3_of_7	5'_and_3'
KB668256	239244	239358	Rev	AFUN014152-RA	1_of_3
KB668256	239630	239709	Fwd	AFUN001313-RA	4_of_7	5'_and_3'
KB668256	239831	239903	Fwd	AFUN001313-RA	5_of_7	5'_and_3'
KB668256	240108	240166	Fwd	AFUN001313-RA	6_of_7
KB668256	240317	240386	Fwd	AFUN001313-RA	7_of_7	5'_and_3'
KB668256	245855	246289	Fwd	AFUN001314-RA	1_of_6	5'_and_3'
KB668256	246789	250007	Fwd	AFUN001314-RA	2_of_6	5'_and_3'
KB668256	250290	250398	Fwd	AFUN001314-RA	3_of_6
KB668256	251203	251282	Fwd	AFUN001314-RA	4_of_6	5'_and_3'
KB668256	251482	251840	Fwd	AFUN001314-RA	5_of_6
KB668256	252061	252145	Fwd	AFUN001314-RA	6_of_6	5'_and_3'
KB668256	253902	253978	Rev	AFUN001315-RA	2_of_2	5'_and_3'
KB668256	254760	256734	Rev	AFUN001315-RA	1_of_2	3'_only
KB668256	260054	264493	Rev	AFUN001316-RA	2_of_2	5'_only
KB668256	264712	265547	Rev	AFUN001316-RA	1_of_2	3'_only
KB668256	267998	268060	Fwd	AFUN001317-RA	1_of_1	5'_and_3'
KB668256	270632	272404	Fwd	AFUN001318-RA	1_of_10
KB668256	272829	275038	Fwd	AFUN001318-RA	2_of_10	5'_and_3'
KB668256	275428	277363	Fwd	AFUN001318-RA	3_of_10	5'_and_3'
KB668256	277469	278522	Fwd	AFUN001318-RA	4_of_10	5'_and_3'
KB668256	278683	279394	Fwd	AFUN001318-RA	5_of_10	5'_and_3'
KB668256	279597	279692	Fwd	AFUN001318-RA	6_of_10	5'_and_3'
KB668256	279886	279950	Fwd	AFUN001318-RA	7_of_10	5'_and_3'
KB668256	280030	280124	Fwd	AFUN001318-RA	8_of_10	5'_and_3'
KB668256	280395	280464	Fwd	AFUN001318-RA	9_of_10	5'_and_3'
KB668256	280556	280617	Fwd	AFUN001318-RA	10_of_10	5'_and_3'
KB668256	310282	310302	Rev	AFUN014153-RA	1_of_1
KB668256	378850	379305	Fwd	AFUN001319-RA	1_of_8	3'_only
KB668256	379692	381611	Fwd	AFUN001319-RA	2_of_8	5'_and_3'
KB668256	381759	384675	Fwd	AFUN001319-RA	3_of_8	5'_and_3'
KB668256	384912	384982	Fwd	AFUN001319-RA	4_of_8	5'_and_3'
KB668256	385158	385227	Fwd	AFUN001319-RA	5_of_8	5'_and_3'
KB668256	385624	385698	Fwd	AFUN001319-RA	6_of_8	5'_and_3'
KB668256	385867	385943	Fwd	AFUN001319-RA	7_of_8	5'_and_3'
KB668256	386052	386114	Fwd	AFUN001319-RA	8_of_8	5'_and_3'
KB668256	388408	388513	Fwd	AFUN001320-RA	1_of_2	5'_and_3'
KB668256	389011	389071	Fwd	AFUN001320-RA	2_of_2	5'_and_3'
KB668256	389624	389693	Rev	AFUN001321-RA	8_of_8	5'_and_3'
KB668256	389789	389868	Rev	AFUN001321-RA	7_of_8	5'_and_3'
KB668256	390146	390219	Rev	AFUN001321-RA	6_of_8	5'_and_3'
KB668256	390846	390914	Rev	AFUN001321-RA	5_of_8	5'_and_3'
KB668256	391031	391195	Rev	AFUN001321-RA	4_of_8	5'_and_3'
KB668256	391434	391655	Rev	AFUN001321-RA	3_of_8	3'_only
KB668256	391696	391699	Rev	AFUN001321-RA	2_of_8
KB668256	391897	392016	Rev	AFUN001321-RA	1_of_8	5'_and_3'
KB668256	393944	394010	Rev	AFUN001322-RA	2_of_2
KB668256	394402	394472	Rev	AFUN001322-RA	1_of_2
KB668256	408049	408115	Rev	AFUN001323-RA	3_of_3	5'_and_3'
KB668256	409123	409183	Rev	AFUN001323-RA	2_of_3	5'_and_3'
KB668256	409413	410907	Rev	AFUN001323-RA	1_of_3	3'_only
KB668256	417420	417487	Rev	AFUN001324-RA	26_of_26	5'_and_3'
KB668256	418117	418221	Rev	AFUN001324-RA	25_of_26	5'_and_3'
KB668256	418326	418410	Rev	AFUN001324-RA	24_of_26	5'_and_3'
KB668256	418682	418864	Rev	AFUN001324-RA	23_of_26	3'_only
KB668256	418879	419025	Rev	AFUN001324-RA	22_of_26
KB668256	419356	419588	Rev	AFUN001324-RA	21_of_26	5'_and_3'
KB668256	419675	421873	Rev	AFUN001324-RA	20_of_26	5'_only
KB668256	422136	422206	Rev	AFUN001324-RA	19_of_26	5'_and_3'
KB668256	422571	423357	Rev	AFUN001324-RA	18_of_26	5'_and_3'
KB668256	423462	423537	Rev	AFUN001324-RA	17_of_26	5'_and_3'
KB668256	424337	426530	Rev	AFUN001324-RA	16_of_26
KB668256	426715	426792	Rev	AFUN001324-RA	15_of_26	5'_and_3'
KB668256	427422	427484	Rev	AFUN001324-RA	14_of_26	5'_and_3'
KB668256	427857	427927	Rev	AFUN001324-RA	13_of_26	5'_and_3'
KB668256	428446	431551	Rev	AFUN001324-RA	12_of_26	3'_only
KB668256	431779	431845	Rev	AFUN001324-RA	11_of_26	5'_and_3'
KB668256	432108	432203	Rev	AFUN001324-RA	10_of_26	5'_and_3'
KB668256	432571	432642	Rev	AFUN001324-RA	9_of_26	5'_and_3'
KB668256	432902	434335	Rev	AFUN001324-RA	8_of_26	5'_and_3'
KB668256	434452	434538	Rev	AFUN001324-RA	7_of_26	5'_and_3'
KB668256	435057	436751	Rev	AFUN001324-RA	6_of_26	5'_and_3'
KB668256	436849	439924	Rev	AFUN001324-RA	5_of_26
KB668256	440151	440226	Rev	AFUN001324-RA	4_of_26	5'_and_3'
KB668256	440871	440953	Rev	AFUN001324-RA	3_of_26	5'_and_3'
KB668256	441213	441304	Rev	AFUN001324-RA	2_of_26	5'_and_3'
KB668256	441421	443701	Rev	AFUN001324-RA	1_of_26	5'_and_3'
KB668256	450618	450679	Rev	AFUN001325-RA	9_of_9
KB668256	450776	450864	Rev	AFUN001325-RA	8_of_9
KB668256	451171	452052	Rev	AFUN001325-RA	7_of_9
KB668256	452960	453029	Rev	AFUN001325-RA	6_of_9
KB668256	453160	454929	Rev	AFUN001325-RA	5_of_9
KB668256	455003	455076	Rev	AFUN001325-RA	4_of_9
KB668256	455173	455249	Rev	AFUN001325-RA	3_of_9	5'_and_3'
KB668256	455425	455508	Rev	AFUN001325-RA	2_of_9
KB668256	456170	456287	Rev	AFUN001325-RA	1_of_9
KB668256	470110	470214	Rev	AFUN001326-RA	4_of_4
KB668256	471117	471211	Rev	AFUN001326-RA	3_of_4
KB668256	471473	474061	Rev	AFUN001326-RA	2_of_4	5'_and_3'
KB668256	474325	474920	Rev	AFUN001326-RA	1_of_4	5'_and_3'
KB668256	483375	483438	Rev	AFUN001327-RA	4_of_4	5'_and_3'
KB668256	484356	484426	Rev	AFUN001327-RA	3_of_4	5'_and_3'
KB668256	484993	485083	Rev	AFUN001327-RA	2_of_4	5'_and_3'
KB668256	485334	485873	Rev	AFUN001327-RA	1_of_4
KB668256	527930	528021	Rev	AFUN001328-RA	4_of_4	5'_and_3'
KB668256	528118	528374	Rev	AFUN001328-RA	3_of_4	5'_and_3'
KB668256	528681	528749	Rev	AFUN001328-RA	2_of_4	5'_and_3'
KB668256	529654	529786	Rev	AFUN001328-RA	1_of_4
KB668256	532657	532742	Fwd	AFUN001329-RA	1_of_6	5'_and_3'
KB668256	533095	533195	Fwd	AFUN001329-RA	2_of_6	5'_and_3'
KB668256	533318	533392	Fwd	AFUN001329-RA	3_of_6	5'_and_3'
KB668256	533626	533765	Fwd	AFUN001329-RA	4_of_6	5'_and_3'
KB668256	533867	534459	Fwd	AFUN001329-RA	5_of_6	5'_and_3'
KB668256	534551	534669	Fwd	AFUN001329-RA	6_of_6	5'_and_3'
KB668256	538134	538254	Rev	AFUN001330-RA	5_of_5
KB668256	538375	540892	Rev	AFUN001330-RA	4_of_5
KB668256	541251	541309	Rev	AFUN001330-RA	3_of_5
KB668256	541467	541832	Rev	AFUN001330-RA	2_of_5
KB668256	542196	542318	Rev	AFUN001330-RA	1_of_5
KB668256	547104	547173	Rev	AFUN001331-RA	3_of_3	5'_and_3'
KB668256	547290	547383	Rev	AFUN001331-RA	2_of_3	5'_and_3'
KB668256	547613	549061	Rev	AFUN001331-RA	1_of_3	5'_and_3'
KB668256	556271	556352	Rev	AFUN001332-RA	3_of_3
KB668256	557000	559192	Rev	AFUN001332-RA	2_of_3
KB668256	559525	561684	Rev	AFUN001332-RA	1_of_3
KB668256	593271	593303	Rev	AFUN014154-RA	4_of_4
KB668256	593443	594361	Rev	AFUN014154-RA	3_of_4
KB668256	593443	594361	Rev	AFUN014154-RB	3_of_3
KB668256	593443	594361	Rev	AFUN014154-RC	3_of_3
KB668256	594694	594766	Fwd	AFUN001333-RA	1_of_1
KB668256	594694	594766	Rev	AFUN014154-RA	2_of_4
KB668256	594694	594766	Rev	AFUN014154-RB	2_of_3
KB668256	594694	594766	Rev	AFUN014154-RC	2_of_3
KB668256	594905	595227	Rev	AFUN014154-RA	1_of_4
KB668256	594905	595227	Rev	AFUN014154-RC	1_of_3
KB668256	594963	595112	Rev	AFUN014154-RB	1_of_3
KB668256	599151	599223	Rev	AFUN001334-RA	2_of_2
KB668256	599556	600604	Rev	AFUN001334-RA	1_of_2
KB668267	5836	5902	Rev	AFUN006544-RA	1_of_1	5'_and_3'
KB668267	6591	6737	Fwd	AFUN006545-RA	1_of_4	5'_only
KB668267	7682	7738	Fwd	AFUN006545-RA	2_of_4
KB668267	8416	8576	Fwd	AFUN006545-RA	3_of_4
KB668267	8668	8737	Fwd	AFUN006545-RA	4_of_4	5'_and_3'
KB668267	12044	12111	Rev	AFUN006546-RA	3_of_3	5'_and_3'
KB668267	12885	12967	Rev	AFUN006546-RA	2_of_3	5'_and_3'
KB668267	13660	13746	Rev	AFUN006546-RA	1_of_3	5'_and_3'
KB668267	19778	19805	Rev	AFUN014674-RA	1_of_1
KB668267	24053	24135	Rev	AFUN006547-RA	6_of_6	5'_and_3'
KB668267	24273	24361	Rev	AFUN006547-RA	5_of_6	5'_and_3'
KB668267	24909	24978	Rev	AFUN006547-RA	4_of_6	5'_and_3'
KB668267	25107	25177	Rev	AFUN006547-RA	3_of_6	5'_and_3'
KB668267	25725	25834	Rev	AFUN006547-RA	2_of_6	5'_and_3'
KB668267	26036	26233	Rev	AFUN006547-RA	1_of_6
KB668267	115696	115966	Rev	AFUN006548-RA	2_of_2	5'_only
KB668267	116120	117182	Rev	AFUN006548-RA	1_of_2	3'_only
KB668267	269372	269958	Rev	AFUN006549-RA	1_of_1	5'_only
KB668267	319200	319264	Rev	AFUN006550-RA	2_of_2
KB668267	319345	319474	Rev	AFUN006550-RA	1_of_2	5'_only
KB668267	319978	320044	Fwd	AFUN006551-RA	1_of_1
KB668267	322806	322875	Rev	AFUN006552-RA	1_of_1
KB668267	323316	323458	Fwd	AFUN006553-RA	1_of_2	5'_and_3'
KB668267	324393	324466	Fwd	AFUN006553-RA	2_of_2	5'_and_3'
KB668267	326482	326622	Fwd	AFUN006555-RA	1_of_6	5'_and_3'
KB668267	327001	327067	Fwd	AFUN006555-RA	2_of_6	5'_and_3'
KB668267	327313	328001	Fwd	AFUN006555-RA	3_of_6	5'_and_3'
KB668267	328130	328200	Fwd	AFUN006555-RA	4_of_6	5'_and_3'
KB668267	328682	328779	Fwd	AFUN006555-RA	5_of_6	5'_and_3'
KB668267	329237	329638	Rev	AFUN006556-RA	4_of_4	3'_only
KB668267	329241	329308	Fwd	AFUN006555-RA	6_of_6
KB668267	329853	329940	Rev	AFUN006556-RA	3_of_4	5'_and_3'
KB668267	330189	330261	Rev	AFUN006556-RA	2_of_4	5'_and_3'
KB668267	330403	330832	Rev	AFUN006556-RA	1_of_4	5'_and_3'
KB668267	333569	333632	Fwd	AFUN006557-RA	1_of_21	5'_and_3'
KB668267	333944	334867	Fwd	AFUN006557-RA	2_of_21
KB668267	335003	335957	Fwd	AFUN006557-RA	3_of_21
KB668267	336154	336225	Fwd	AFUN006557-RA	4_of_21
KB668267	336513	337179	Fwd	AFUN006557-RA	5_of_21
KB668267	337340	337398	Fwd	AFUN006557-RA	6_of_21
KB668267	337664	338690	Fwd	AFUN006557-RA	7_of_21
KB668267	338896	338975	Fwd	AFUN006557-RA	8_of_21
KB668267	339216	339943	Fwd	AFUN006557-RA	9_of_21
KB668267	340077	340148	Fwd	AFUN006557-RA	10_of_21
KB668267	340266	341310	Fwd	AFUN006557-RA	11_of_21
KB668267	341491	341578	Fwd	AFUN006557-RA	12_of_21
KB668267	341879	343166	Fwd	AFUN006557-RA	13_of_21
KB668267	343269	343344	Fwd	AFUN006557-RA	14_of_21
KB668267	343603	344284	Fwd	AFUN006557-RA	15_of_21
KB668267	344570	345242	Fwd	AFUN006557-RA	16_of_21
KB668267	345396	345480	Fwd	AFUN006557-RA	17_of_21
KB668267	345722	346657	Fwd	AFUN006557-RA	18_of_21
KB668267	346849	346920	Fwd	AFUN006557-RA	19_of_21
KB668267	347179	348148	Fwd	AFUN006557-RA	20_of_21
KB668267	348266	348339	Fwd	AFUN006557-RA	21_of_21
KB668267	349323	349583	Rev	AFUN006558-RA	4_of_4
KB668267	349874	349950	Rev	AFUN006558-RA	3_of_4
KB668267	350089	351282	Rev	AFUN006558-RA	2_of_4
KB668267	351592	351663	Rev	AFUN006558-RA	1_of_4
KB668267	353765	353836	Fwd	AFUN006559-RA	1_of_1
KB668267	356038	356102	Fwd	AFUN006560-RA	1_of_1
KB668267	426834	428238	Fwd	AFUN014675-RA	1_of_1
KB668267	517077	518504	Fwd	AFUN006561-RA	1_of_2	5'_only
[truncated: 42,032 more rows]
